# Supplementary material for: Отрицательные признаки множественности лиц в гражданском праве
Source: Oxford University Press journal article supplement (doi:10.1158/2326-6066.cir-13-0088), 2014-01-01
Supplement: 23266066cir130088-sup-tab1.xlsx [file 23266066cir130088-sup-tab1.xlsx]

## Sheet: supplemental.table.S1
Supplemental Table S1. CT genes used in this study
gene	chromosome
ACTL8	chr1
ADAM2	chr8
ADAM29	chr4
AKAP4	chrX
BAGE	chr21
BRDT	chr1
C21orf99	chr21
CAGE1	chr6
CALR3	chr19
CCDC54	chr3
CPXCR1	chrX
CSAG1	chrX
CSAG2	chrX
CT45A1	chrX
CT45A2	chrX
CT45A4	chrX
CT47A1	chrX
CT47A10	chrX
CT47A11	chrX
CT47A2	chrX
CT47A6	chrX
CT47A7	chrX
CT47A9	chrX
CT47B1	chrX
CT62	chr15
CTAG1B	chrX
CTCFL	chr20
CXorf48	chrX
CXorf61	chrX
DDX53	chrX
DKKL1	chr19
DPPA2	chr3
FAM46D	chrX
FATE1	chrX
FMR1NB	chrX
FTHL17	chrX
GAGE1	chrX
GAGE12D	chrX
GAGE12F	chrX
GAGE12J	chrX
GAGE13	chrX
GAGE2A	chrX
GAGE4	chrX
GAGE8	chrX
HORMAD1	chr1
LDHC	chr11
LEMD1	chr1
LIPI	chr21
LUZP4	chrX
MAEL	chr1
MAGEA1	chrX
MAGEA10	chrX
MAGEA11	chrX
MAGEA12	chrX
MAGEA2	chrX
MAGEA3	chrX
MAGEA4	chrX
MAGEA6	chrX
MAGEA8	chrX
MAGEA9B	chrX
MAGEB1	chrX
MAGEB16	chrX
MAGEB18	chrX
MAGEB2	chrX
MAGEB3	chrX
MAGEB4	chrX
MAGEB6	chrX
MAGEC1	chrX
MAGEC2	chrX
MORC1	chr3
NLRP4	chr19
NXF2	chrX
NXF2B	chrX
ODF1	chr8
ODF3	chr11
ODF4	chr17
PAGE1	chrX
PAGE2	chrX
PAGE2B	chrX
PAGE3	chrX
PAGE5	chrX
PASD1	chrX
PLAC1	chrX
POTEA	chr8
POTEB	chr15
POTEC	chr18
POTED	chr21
POTEH	chr22
PRAME	chr22
PRM1	chr16
PRM2	chr16
PRSS50	chr3
PRSS54	chr16
RBM46	chr4
RHOXF2B	chrX
SAGE1	chrX
SEMG1	chr20
SLCO6A1	chr5
SPACA3	chr17
SPANXA2	chrX
SPANXB2	chrX
SPANXC	chrX
SPANXE	chrX
SPANXN1	chrX
SPANXN2	chrX
SPANXN3	chrX
SPANXN4	chrX
SPANXN5	chrX
SPATA19	chr11
SPO11	chr20
SSX1	chrX
SSX2	chrX
SSX3	chrX
SSX5	chrX
SSX6	chrX
SSX7	chrX
SYCP1	chr1
TAF7L	chrX
TEX101	chr19
TEX14	chr17
TEX15	chr8
TFDP3	chrX
THEG	chr19
TPTE	chr21
TSPY2	chrY
TSPY3	chrY
XAGE1D	chrX
XAGE5	chrX
ZNF645	chrX
