# Supplementary material for: Отрицательные признаки множественности лиц в гражданском праве
Source: Oxford University Press journal article supplement (doi:10.1158/2326-6066.cir-13-0088), 2014-01-01
Supplement: 23266066cir130088-sup-tab2.xlsx [file 23266066cir130088-sup-tab2.xlsx]

## Sheet: Table.S1
Supplemental Table S2. List of TCGA tumors and sample numbers used in this study
tumor	code	RNAseqV2		Met Infinium 450		have_both
		normal_no	tumor_no	normal_no	tumor_no
breast invasive carcinoma	BRCA	107	849	98	548	607
colon adenocarcinoma	COAD	0	192	38	254	30
glioblastoma	GBM	0	156	1	112	60
head and neck squamous carcinoma	HNSC	37	303	50	292	306
renal clear cell carcinoma	KIRC	71	480	156	242	254
lung adenocarcinoma	LUAD	57	353	32	220	239
lung squamous carcinoma	LUSC	35	259	42	149	131
ovarian serous cystadenocarcinoma	OV	0	262	0	0	0
skin cutaneous melanoma	SKCM	0	267	0	255	249
endometrial carcinoma	UCEC	11	370	36	334	268
