# Supplementary material for: Отрицательные признаки множественности лиц в гражданском праве
Source: Oxford University Press journal article supplement (doi:10.1158/2326-6066.cir-13-0088), 2014-01-01
Supplement: 23266066cir130088-sup-tab3.xlsx [file 23266066cir130088-sup-tab3.xlsx]

## Sheet: Frequency.CT-gene.expr.in.cance
Supplemental Table S3. Estimated overexpression frequencies of CT genes in human cancers
gene	chr	BRCA	COAD	HNSC	KIRC	LUAD	LUSC	UCEC	OV	GBM	SKCM
PLAC1	chrX	56.89	26.56	65.02	1.88	35.13	54.44	11.08	39.69	5.13	14.61
MAGEA6	chrX	11.07	13.54	38.61	1.04	22.38	47.88	10	3.05	0	61.42
MAGEA3	chrX	11.31	14.58	36.63	0.83	21.81	47.1	10.27	1.91	0	59.93
CSAG1	chrX	8.72	7.81	32.34	2.29	18.98	31.27	6.76	7.25	21.15	58.43
MAGEA2	chrX	8.48	16.67	25.08	0.83	18.98	35.14	13.51	1.91	0	58.43
MAGEA12	chrX	9.42	10.42	18.81	1.46	19.83	28.96	6.49	3.44	14.74	59.55
MAGEA11	chrX	2.47	20.83	27.06	0.42	6.23	49.42	13.78	28.24	0	23.22
MAGEA9B	chrX	4.71	11.46	28.38	0.42	10.48	56.76	24.05	16.03	1.28	16.85
MAGEA4	chrX	4.59	2.6	34.98	0.62	10.2	54.83	8.38	25.57	0.64	19.48
CSAG2	chrX	5.06	8.85	28.71	0.62	11.9	30.89	16.49	7.25	1.28	47.94
MAGEA1	chrX	11.78	4.17	17.16	0.42	14.16	41.7	6.76	11.07	0.64	38.2
MAGEC1	chrX	5.89	1.56	9.9	1.46	12.46	22.01	4.32	28.63	1.92	46.82
MAGEC2	chrX	8.24	2.08	9.24	1.88	14.73	21.24	7.3	10.31	2.56	49.81
MAGEA10	chrX	3.53	2.08	13.86	1.04	10.48	36.29	10	15.65	0	32.58
MAGEB6	chrX	2.71	4.69	22.77	0.42	7.08	38.61	5.68	10.31	2.56	22.1
MAGEB2	chrX	3.42	4.17	23.76	2.5	11.61	34.36	3.24	6.87	0	21.72
CXorf61	chrX	13.66	5.21	3.96	0	46.74	27.03	2.43	1.91	0	1.87
CTAG1B	chrX	4.36	1.04	7.26	0.83	11.61	23.17	6.22	14.5	0	29.59
SSX1	chrX	4.71	1.56	2.64	1.88	7.08	4.63	3.24	13.36	0	49.06
SAGE1	chrX	1.53	2.6	9.57	1.25	5.67	22.01	14.59	13.74	3.85	8.99
PAGE2B	chrX	5.06	2.08	7.26	1.88	8.78	16.22	17.84	6.87	0.64	14.61
CXorf48	chrX	1.88	1.56	3.3	4.58	5.38	13.9	14.86	9.92	1.92	19.1
PAGE1	chrX	1.41	7.81	3.96	0.83	9.07	9.65	15.95	7.63	0	15.36
NXF2	chrX	0.71	6.77	3.96	0.42	1.42	14.29	20.27	11.45	0	4.12
PAGE5	chrX	3.89	0.52	1.32	0.83	7.37	3.86	4.32	3.82	0	31.09
SSX6	chrX	1.06	3.12	6.93	0.83	5.1	5.79	8.38	11.83	0	12.73
MAGEB18	chrX	4.24	3.12	2.64	2.92	1.13	5.79	5.14	17.56	0.64	12.36
FATE1	chrX	0.94	0	1.32	45.42	0.28	1.93	1.62	0.76	1.92	1.12
SPANXB2	chrX	8.72	4.17	16.83	2.29	5.67	9.65	2.7	1.15	0	2.62
PAGE2	chrX	2.47	0	4.62	0.83	5.95	12.74	7.3	8.02	0	10.49
CT45A2	chrX	0.94	0.52	3.63	0	1.98	8.88	10.54	20.23	0	5.24
TAF7L	chrX	1.41	0.52	8.58	2.5	5.95	3.86	4.86	5.73	0	17.98
GAGE1	chrX	1.77	3.65	3.3	0.42	3.97	12.74	5.68	3.05	0	14.98
SSX2	chrX	4.36	2.08	0.33	0.83	4.25	4.25	5.68	5.34	0	20.97
MAGEB1	chrX	6.36	0.52	3.63	0.83	5.95	8.88	1.08	4.2	0	15.36
SSX5	chrX	0.24	2.08	0.33	1.04	8.78	2.7	3.24	8.02	0.64	17.98
GAGE4	chrX	1.53	1.04	3.96	0	4.53	11.2	3.24	5.73	0	13.48
PASD1	chrX	0.82	1.56	2.97	0.62	5.67	8.88	5.14	6.49	0	11.99
CT45A4	chrX	0.94	1.04	2.31	0	1.98	10.04	12.16	7.63	0	4.49
GAGE12D	chrX	1.18	2.08	2.64	0.21	4.25	8.11	4.05	7.63	0.64	9.74
GAGE12F	chrX	0.35	13.54	0	0.21	1.42	1.93	15.68	0.38	0	4.12
CT45A1	chrX	1.53	0.52	3.63	0.42	2.83	14.29	3.51	4.2	0	6.37
XAGE1D	chrX	0.24	0	0	0.21	27.2	3.47	0.27	0	0	5.62
GAGE12J	chrX	1.3	2.08	4.62	0.42	4.25	9.27	3.78	0.76	0	10.11
MAGEB16	chrX	2.47	0.52	2.31	0.42	6.23	7.34	2.43	0.76	0	13.86
MAGEA8	chrX	3.42	0.52	1.98	0.21	7.65	5.02	5.68	3.82	0.64	6.74
DDX53	chrX	2.36	1.04	4.29	0.42	7.08	5.79	2.7	3.82	0.64	5.24
GAGE8	chrX	0.47	2.6	1.65	0	3.68	4.63	5.68	5.34	0	6.37
GAGE2A	chrX	0.47	3.65	2.31	0.42	2.83	6.18	4.86	2.29	0	7.12
SSX3	chrX	1.65	1.56	0	0.62	1.7	2.7	5.14	0.76	0	12.73
GAGE13	chrX	0.35	3.65	0.66	0	1.98	4.25	7.3	2.67	0.64	4.49
FMR1NB	chrX	2.94	1.04	1.65	1.04	4.53	0.77	7.57	1.53	0	3.37
LUZP4	chrX	0.59	0	1.65	1.04	1.13	3.47	0.81	1.15	0	10.86
RHOXF2B	chrX	0.59	6.25	0.33	2.08	1.13	1.54	2.97	1.53	0.64	3.37
SPANXN3	chrX	1.88	2.6	3.96	4.17	1.42	1.16	0.54	3.05	0	1.12
XAGE5	chrX	0.47	0	0	0.62	1.7	4.63	1.35	3.82	0	5.62
NXF2B	chrX	0	0.52	0.33	0	0.57	0.39	12.16	3.82	0	0
CT47A7	chrX	0.12	3.12	0	0.21	0	0	7.3	1.53	0	0.75
MAGEB3	chrX	0.59	0.52	0.33	0	0.28	1.16	1.35	5.34	0	0.75
CPXCR1	chrX	0	0.52	0.33	0	0.57	0.39	4.32	1.53	1.92	0
FTHL17	chrX	1.41	0	2.97	0	1.42	2.32	0	0	0	0
SPANXC	chrX	1.06	0	2.31	0	0.85	1.54	0.54	0	0	1.12
FAM46D	chrX	0.82	0	0	0	0.28	1.16	0.81	3.05	0	1.12
PAGE3	chrX	0.24	0	0.33	0.42	1.7	0.77	0.54	1.15	0	1.87
CT47A2	chrX	0	0.52	0.33	0	0.28	0.77	1.35	1.53	0	1.12
SSX7	chrX	0	1.56	0	0.42	0	0	2.7	0	0	0
SPANXN4	chrX	0.12	0	0	0.21	0.57	0.39	1.08	0.76	0	1.5
CT47A6	chrX	0	0.52	0	0	0	0.39	1.08	0	0	1.87
CT47B1	chrX	0	0	0	0.21	0.57	0.39	0.81	0	0	1.87
MAGEB4	chrX	3.53	0	0	0	0	0	0	0	0	0
CT47A1	chrX	0	0.52	0	0	0.28	0.39	1.08	0.38	0	0.75
SPANXN5	chrX	0.24	0	1.32	0	0.28	0.39	0.81	0	0	0
CT47A10	chrX	0	0.52	0	0	0	0.39	1.35	0	0	0.75
CT47A11	chrX	0	0.52	0	0	0.28	0	2.16	0	0	0
AKAP4	chrX	0	2.08	0	0	0	0.39	0	0.38	0	0
SPANXA2	chrX	0.94	0	0	0	0	0.39	0.54	0	0	0.37
SPANXN2	chrX	0	0.52	0	0	0	0.39	0.54	0	0	0.75
CT47A9	chrX	0	0.52	0	0.21	0	0	1.08	0	0	0.37
SPANXE	chrX	0.12	0	0	0	0	0.39	0.27	0	0	0.75
SPANXN1	chrX	0	0	0	0	0	0	0.27	0	0	1.12
ZNF645	chrX	0	0	0	0	0	0	1.35	0	0	0
TFDP3	chrX	0	0	0	0	0	0	0	0	0	1.12
PRAME	chr22	23.32	0	20.13	14.58	21.25	63.71	96.22	82.82	3.21	95.88
ACTL8	chr1	30.39	52.08	20.46	5	11.9	25.87	28.92	45.42	0.64	13.11
HORMAD1	chr1	12.96	3.12	40.59	0	36.54	46.33	6.22	3.82	0	21.72
TEX15	chr8	3.53	0	11.88	41.67	7.65	11.97	4.59	13.36	6.41	19.48
LEMD1	chr1	3.06	8.85	9.9	0	12.75	8.49	14.32	56.49	1.28	0
CAGE1	chr6	2.71	5.73	34.65	0	6.52	33.59	5.41	10.69	0.64	0.37
SLCO6A1	chr5	2.12	0	14.85	2.08	11.9	11.2	18.11	18.32	1.28	5.99
SPACA3	chr17	0.47	42.71	1.32	0.62	9.07	1.54	2.43	4.2	0	16.1
CTCFL	chr20	0.12	2.08	2.97	0	1.7	10.81	9.73	41.22	0	8.99
TPTE	chr21	3.77	1.56	3.3	0.21	8.5	8.11	15.14	6.49	0.64	26.97
BRDT	chr1	6.01	0	12.54	0	31.16	19.69	1.35	0.76	0	0
MORC1	chr3	0.94	2.08	1.32	0.62	0.85	10.81	2.16	3.44	23.08	21.72
NLRP4	chr19	0.35	1.04	3.3	0.42	3.12	5.79	5.68	11.45	14.74	11.24
PRSS50	chr3	0.35	0.52	1.65	0.42	1.98	10.04	13.24	25.19	0	1.5
BAGE	chr21	2.12	0.52	2.64	0.21	6.8	9.65	2.7	4.96	0	25.09
DPPA2	chr3	0.47	0	9.24	0.83	3.97	16.6	4.59	9.54	0	2.25
MAEL	chr1	2.24	0.52	0.66	1.67	3.4	4.25	1.08	0.76	16.03	7.49
CALR3	chr19	1.41	0	0.33	0.42	3.12	4.25	13.51	8.02	1.28	1.5
POTEC	chr18	10.72	1.56	0.66	0	0	0.39	2.16	16.79	0	0.75
DKKL1	chr19	2	0	0.66	0.21	3.12	3.86	11.62	7.63	1.28	2.62
PRSS54	chr16	0.71	1.56	0.33	0	0	0	9.46	0	20.51	0.37
TSPY2	chrY	0.12	0.52	2.31	0.21	3.68	9.65	0.81	0	0.64	9.36
POTEH	chr22	1.65	1.56	0.66	0	0.28	2.32	14.59	4.58	0	1.5
RBM46	chr4	0.94	0	0.33	8.96	2.55	5.02	0.54	2.29	1.92	2.25
TEX14	chr17	13.07	0	0	0	1.13	0.77	0.54	0.38	1.92	5.99
TSPY3	chrY	0	0	1.65	0	2.83	8.11	0.81	0	0	4.87
THEG	chr19	3.18	0	3.63	0.42	3.12	6.56	0	0.38	0	0.37
SEMG1	chr20	0.24	15.62	0.33	0	0.28	0	0	0	0	0.75
POTEA	chr8	0.35	0.52	0.99	0.62	1.13	4.63	2.97	3.82	0	0.37
POTED	chr21	6.36	1.04	0	0	0.28	0	2.16	1.15	0	3
ODF3	chr11	0.71	1.56	0	0.62	0.28	0.39	3.24	6.11	0	0.37
ADAM2	chr8	2.47	0	0	1.04	3.12	0.39	1.89	0	0	0
SPO11	chr20	0.35	2.08	0.99	0.42	0.28	0.77	0.54	2.29	0	0
LIPI	chr21	0.71	0	0	2.71	0.57	0.39	0	0	0	0
C21orf99	chr21	0.24	0.52	0	0.62	1.13	0.39	1.35	0	0	0
SYCP1	chr1	2.36	0	0.33	0	0	0	0	0.38	0	0.37
PRM1	chr16	0.12	0.52	0	0	0.57	0	0.81	0.76	0.64	0
ADAM29	chr4	2.12	0	0	0	0.28	0	0	0	0	0
ODF1	chr8	0.12	0.52	0	0	0.28	0	0.81	0.38	0	0
SPATA19	chr11	0	0	0	0	0	1.16	0	0.38	0	0
POTEB	chr15	0	0	0	0	0	0	1.08	0.38	0	0
LDHC	chr11	0.12	0	0	0	0	0	0	0.38	0	0.37
CT62	chr15	0.35	0	0	0	0	0	0	0	0	0
CCDC54	chr3	0	0	0	0	0.28	0	0	0	0	0
ODF4	chr17	0	0	0	0	0	0	0.27	0	0	0
PRM2	chr16	0	0	0	0	0	0	0	0	0	0
TEX101	chr19	0	0	0	0	0	0	0	0	0	0
