# Supplementary material for: Отрицательные признаки множественности лиц в гражданском праве
Source: Oxford University Press journal article supplement (doi:10.1158/2326-6066.cir-13-0088), 2014-01-01
Supplement: 23266066cir130088-sup-tab4.xlsx [file 23266066cir130088-sup-tab4.xlsx]

## Sheet: Frequency.CT-gene.expr.in.cance
Supplemental Table S4. Estimated overexpression frequencies of CT genes in human cancer subtypes
gene	chr	BRCA_basal	BRCA_lumA	BRCA_lumB	BRCA_HER2	COAD_3	COAD_4	COAD_2	HNSC_1	HNSC_2	HNSC_3	KIRC_ccAB	KIRC_ccB	KIRC_ccA	LUAD_squamo	LUAD_magno	LUAD_bronch	LUSC_basal	LUSC_classical	OV_prolif	OV_mesench	UCEC_1	UCEC_2	UCEC_3	UCEC_4	GBM_classical	GBM_proneural	GBM_mesench	GBM_neural	SKCM_1	SKCM_2	SKCM_3
PLAC1	chrX	22.31	62.07	67.45	64	32.26	34	12.24	64.29	77.23	45.33	0.78	5.19	0	53.49	44.44	24.21	56.76	58.12	57.89	25.68	4.29	30	3.03	8.97	0	15.79	2.86	2.56	8.73	5	39.34
MAGEA6	chrX	27.69	1.29	6.13	19.43	9.68	16	12.24	40.48	42.57	30.67	0	2.96	0	30.23	51.39	7.89	48.65	49.57	5.26	1.35	10	12.22	6.82	12.82	0	0	0	0	60.32	47.5	81.97
MAGEA3	chrX	26.15	1.29	8.02	19.43	9.68	17	14.29	39.29	40.59	29.33	0	2.22	0	27.91	54.17	6.84	45.95	51.28	2.63	1.35	10	12.22	6.82	14.1	0	0	0	0	57.94	47.5	80.33
CSAG1	chrX	16.92	0.86	4.72	17.71	6.45	8	8.16	30.95	43.56	17.33	0.78	5.19	1.12	24.42	44.44	6.84	31.08	27.35	10.53	4.73	4.29	13.33	3.03	7.69	15.79	21.05	34.29	17.95	58.73	45	75.41
MAGEA2	chrX	20	1.29	5.66	14.86	12.9	18	16.33	23.81	30.69	20	0	2.22	0	25.58	48.61	4.74	25.68	40.17	2.63	1.35	7.14	20	9.09	19.23	0	0	0	0	55.56	43.75	83.61
MAGEA12	chrX	14.62	1.29	6.6	20.57	16.13	10	8.16	15.48	27.72	13.33	0.78	2.96	0.56	27.91	44.44	6.84	25.68	26.5	5.26	2.03	4.29	12.22	3.03	7.69	10.53	15.79	25.71	10.26	60.32	45	77.05
MAGEA9B	chrX	16.15	1.29	2.36	5.71	9.68	17	4.08	25	31.68	33.33	0	1.48	0	11.63	26.39	3.68	40.54	69.23	25.44	8.78	10	44.44	20.45	19.23	0	5.26	0	0	19.84	7.5	22.95
CSAG2	chrX	16.15	0.43	1.89	5.14	3.23	9	14.29	22.62	37.62	17.33	0	1.48	0	12.79	31.94	3.68	28.38	31.62	7.89	6.76	4.29	37.78	8.33	16.67	0	2.63	0	0	42.86	37.5	72.13
MAGEA11	chrX	8.46	1.29	0.94	2.86	25.81	31	2.04	17.86	37.62	26.67	0	1.48	0	5.81	15.28	3.16	39.19	60.68	33.33	24.32	2.86	40	3.79	10.26	0	0	0	0	19.84	15	40.98
MAGEA4	chrX	19.23	0	0.47	4	3.23	4	0	35.71	46.53	22.67	0	2.22	0	11.63	25	4.21	50	64.96	31.58	20.95	1.43	27.78	1.52	3.85	0	0	0	2.56	19.05	8.75	34.43
MAGEA1	chrX	5.38	12.07	11.32	18.29	3.23	3	8.16	15.48	22.77	16	0	0.74	0	16.28	34.72	5.26	35.14	48.72	10.53	11.49	4.29	13.33	3.79	6.41	0	0	0	2.56	39.68	18.75	60.66
MAGEC1	chrX	4.62	2.59	4.25	15.43	3.23	1	2.04	9.52	12.87	9.33	0.78	2.96	0.56	17.44	23.61	5.79	16.22	28.21	35.09	23.65	0	16.67	0	1.28	0	5.26	0	2.56	49.21	31.25	62.3
MAGEC2	chrX	8.46	4.74	8.96	13.14	0	1	6.12	10.71	12.87	4	0	5.19	0.56	23.26	23.61	7.37	21.62	21.37	13.16	8.11	0	26.67	0.76	2.56	0	7.89	0	2.56	52.38	32.5	67.21
MAGEA10	chrX	8.46	0.43	0.94	6.86	0	3	0	15.48	12.87	18.67	0	3.7	0	12.79	26.39	3.16	28.38	42.74	19.3	12.84	4.29	27.78	3.03	6.41	0	0	0	0	31.75	12.5	60.66
CXorf61	chrX	68.46	0.43	0	5.71	3.23	6	4.08	2.38	4.95	5.33	0	0	0	48.84	55.56	43.68	27.03	24.79	0.88	2.7	1.43	0	0.76	8.97	0	0	0	0	0.79	0	6.56
MAGEB6	chrX	3.85	0.43	1.89	6.29	0	7	2.04	20.24	26.73	21.33	0	0.74	0	15.12	12.5	1.58	20.27	54.7	12.28	8.78	2.86	12.22	1.52	7.69	0	5.26	0	5.13	25.4	17.5	21.31
MAGEB2	chrX	3.08	0.86	2.36	5.71	0	5	4.08	19.05	34.65	20	0	8.15	0	15.12	26.39	4.21	32.43	41.03	7.89	6.08	1.43	7.78	0.76	3.85	0	0	0	0	26.98	10	26.23
CTAG1B	chrX	15.38	0.43	1.89	5.14	3.23	1	0	3.57	11.88	5.33	0	1.48	0.56	10.47	31.94	4.21	16.22	25.64	21.05	9.46	1.43	12.22	4.55	6.41	0	0	0	0	34.13	17.5	36.07
SSX1	chrX	5.38	1.72	3.77	10.29	3.23	0	4.08	1.19	3.96	2.67	0.78	4.44	0.56	8.14	16.67	2.63	6.76	0.85	15.79	11.49	0	11.11	0.76	1.28	0	0	0	0	51.59	52.5	39.34
PAGE2B	chrX	7.69	1.72	5.19	6.29	0	3	2.04	8.33	7.92	5.33	0	5.19	1.12	12.79	16.67	3.68	13.51	20.51	8.77	5.41	8.57	44.44	8.33	11.54	0	0	0	2.56	16.67	8.75	18.03
SAGE1	chrX	4.62	0.86	0.47	2.29	9.68	1	2.04	3.57	13.86	12	0.78	3.7	0	5.81	15.28	2.11	12.16	29.06	15.79	12.16	8.57	22.22	16.67	7.69	0	2.63	0	10.26	5.56	2.5	24.59
CXorf48	chrX	3.08	0.43	2.36	2.29	0	3	0	2.38	2.97	5.33	0	5.19	8.43	5.81	12.5	2.63	12.16	16.24	11.4	8.78	15.71	28.89	6.82	11.54	2.63	2.63	0	2.56	24.6	7.5	22.95
PAGE1	chrX	4.62	0	0.47	2.29	12.9	7	6.12	3.57	6.93	1.33	0	2.96	0	9.3	20.83	4.74	8.11	9.4	7.02	8.11	21.43	14.44	15.15	14.1	0	0	0	0	18.25	7.5	19.67
NXF2	chrX	3.85	0	0	0.57	3.23	10	4.08	1.19	3.96	6.67	0	1.48	0	0	5.56	0.53	4.05	17.09	16.67	7.43	10	46.67	15.15	7.69	0	0	0	0	2.38	3.75	8.2
PAGE5	chrX	2.31	0.86	4.25	9.14	0	1	0	2.38	1.98	0	0	2.22	0	13.95	12.5	2.11	5.41	1.71	5.26	2.7	1.43	13.33	2.27	0	0	0	0	0	38.1	13.75	39.34
FATE1	chrX	0	1.29	0	1.71	0	0	0	1.19	0	4	48.06	33.33	58.99	0	1.39	0	4.05	0	0.88	0.68	2.86	3.33	0.76	0	5.26	2.63	0	0	0.79	1.25	1.64
SPANXB2	chrX	3.85	5.17	18.4	5.71	9.68	2	4.08	23.81	21.78	5.33	0	7.41	0	10.47	11.11	1.58	9.46	8.55	0	2.03	1.43	4.44	0.76	5.13	0	0	0	0	0.79	1.25	8.2
SSX6	chrX	1.54	0.43	0.47	1.71	3.23	2	6.12	4.76	4.95	13.33	0	2.96	0	4.65	11.11	3.16	2.7	9.4	17.54	7.43	2.86	25.56	2.27	3.85	0	0	0	0	11.11	13.75	14.75
MAGEB18	chrX	0.77	1.29	8.96	5.71	0	4	4.08	2.38	4.95	1.33	0.78	8.15	0.56	3.49	1.39	0	2.7	8.55	17.54	17.57	1.43	11.11	3.03	5.13	0	2.63	0	0	11.11	8.75	19.67
SSX2	chrX	6.15	1.29	3.77	7.43	9.68	1	0	0	0.99	0	0	2.22	0	4.65	12.5	1.05	6.76	2.56	3.51	6.76	1.43	17.78	2.27	1.28	0	0	0	0	23.81	11.25	27.87
PAGE2	chrX	5.38	1.29	2.83	1.71	0	0	0	5.95	5.94	1.33	0	2.96	0	8.14	11.11	3.16	10.81	14.53	10.53	6.08	0	22.22	2.27	5.13	0	0	0	0	14.29	3.75	11.48
GAGE1	chrX	2.31	0.86	2.36	1.71	9.68	3	2.04	2.38	4.95	2.67	0	1.48	0	6.98	8.33	1.05	10.81	15.38	3.51	2.7	0	20	1.52	1.28	0	0	0	0	16.67	6.25	22.95
TAF7L	chrX	4.62	0	0.94	0	0	1	0	1.19	1.98	26.67	0	0	0	4.65	8.33	5.79	4.05	0.85	7.89	4.05	1.43	6.67	2.27	10.26	0	0	0	0	14.29	20	22.95
MAGEB1	chrX	25.38	0.43	1.89	5.71	0	1	0	3.57	6.93	0	0	2.96	0	8.14	11.11	2.63	13.51	9.4	7.89	1.35	0	3.33	0	1.28	0	0	0	0	23.02	3.75	14.75
CT45A2	chrX	0.77	0.86	0.47	2.29	0	1	0	3.57	1.98	8	0	0	0	2.33	5.56	0.53	4.05	10.26	23.68	17.57	2.86	22.22	9.09	6.41	0	0	0	0	2.38	3.75	13.11
GAGE12F	chrX	0.77	0	0.47	0.57	25.81	11	12.24	0	0	0	0	0.74	0	3.49	2.78	0	2.7	1.71	0	0.68	7.14	37.78	6.82	12.82	0	0	0	0	3.97	2.5	6.56
SSX5	chrX	0	0	0.47	0.57	3.23	2	2.04	0	0.99	0	0	2.22	0.56	5.81	11.11	9.47	2.7	1.71	8.77	7.43	0	11.11	0.76	1.28	0	0	0	2.56	13.49	25	18.03
PASD1	chrX	3.08	0	0	1.14	0	2	2.04	3.57	2.97	4	0.78	1.48	0	5.81	16.67	1.05	6.76	11.11	6.14	6.76	0	13.33	3.03	3.85	0	0	0	0	14.29	6.25	14.75
GAGE4	chrX	1.54	0	3.77	1.14	3.23	0	2.04	2.38	5.94	2.67	0	0	0	4.65	11.11	2.11	9.46	14.53	8.77	3.38	0	13.33	0	0	0	0	0	0	16.67	5	18.03
GAGE12D	chrX	1.54	0	2.36	1.71	6.45	1	2.04	2.38	2.97	4	0	0.74	0	3.49	12.5	1.58	6.76	11.11	9.65	6.08	0	14.44	0.76	1.28	0	2.63	0	0	11.11	5	13.11
MAGEB16	chrX	3.08	2.16	2.36	3.43	3.23	0	0	2.38	3.96	1.33	0	1.48	0	9.3	12.5	2.63	14.86	5.98	0.88	0.68	1.43	5.56	0.76	2.56	0	0	0	0	15.08	6.25	21.31
CT45A4	chrX	2.31	0.86	0.47	1.14	0	2	0	2.38	1.98	4	0	0	0	3.49	4.17	0.53	5.41	12.82	7.02	8.11	5.71	23.33	11.36	6.41	0	0	0	0	0.79	2.5	14.75
MAGEA8	chrX	3.85	2.59	1.89	7.43	3.23	0	0	1.19	1.98	2.67	0	0.74	0	6.98	19.44	3.16	1.35	6.84	2.63	4.73	0	12.22	4.55	5.13	0	2.63	0	0	8.73	3.75	6.56
GAGE12J	chrX	2.31	0.43	1.89	1.14	6.45	1	2.04	1.19	6.93	5.33	0	1.48	0	4.65	11.11	1.58	6.76	11.11	0.88	0.68	0	14.44	0	1.28	0	0	0	0	10.32	6.25	14.75
CT45A1	chrX	3.85	0.86	0.47	2.29	0	1	0	3.57	2.97	6.67	0	1.48	0	2.33	9.72	0.53	6.76	18.8	7.02	2.03	0	7.78	2.27	3.85	0	0	0	0	3.17	2.5	18.03
DDX53	chrX	1.54	0.86	3.3	4.57	3.23	1	0	1.19	7.92	5.33	0	0.74	0	13.95	12.5	2.11	6.76	5.13	6.14	2.03	0	6.67	1.52	2.56	0	2.63	0	0	7.14	1.25	6.56
XAGE1D	chrX	0.77	0	0	0.57	0	0	0	0	0	0	0	0.74	0	38.37	13.89	27.89	4.05	0	0	0	0	1.11	0	0	0	0	0	0	5.56	3.75	8.2
GAGE2A	chrX	0	0.43	0.47	1.14	12.9	1	2.04	1.19	3.96	2.67	0	1.48	0	2.33	9.72	0.53	8.11	6.84	2.63	2.03	0	16.67	0.76	2.56	0	0	0	0	7.94	3.75	9.84
GAGE8	chrX	0.77	0.43	0.47	0.57	6.45	1	4.08	1.19	1.98	2.67	0	0	0	4.65	9.72	1.05	4.05	6.84	5.26	5.41	0	17.78	1.52	3.85	0	0	0	0	7.94	2.5	8.2
GAGE13	chrX	0	0	0.94	0.57	9.68	1	6.12	0	0	1.33	0	0	0	1.16	6.94	0.53	2.7	6.84	2.63	2.7	1.43	21.11	2.27	5.13	0	2.63	0	0	4.76	2.5	6.56
FMR1NB	chrX	2.31	2.16	2.36	5.14	0	1	0	2.38	2.97	0	0	2.96	0	8.14	9.72	1.05	1.35	0.85	0.88	2.03	7.14	20	3.79	0	0	0	0	0	3.17	0	8.2
SSX3	chrX	2.31	0	0.94	4.57	0	1	2.04	0	0	0	0	1.48	0	1.16	5.56	0.53	1.35	1.71	0.88	0.68	1.43	14.44	1.52	3.85	0	0	0	0	15.87	7.5	13.11
RHOXF2B	chrX	0.77	0	1.42	0.57	19.35	2	6.12	1.19	0	0	1.55	0	0.56	2.33	1.39	0.53	2.7	0.85	3.51	0	0	10	1.52	0	0	2.63	0	0	3.97	1.25	4.92
NXF2B	chrX	0	0	0	0	3.23	0	0	0	0.99	0	0	0	0	0	1.39	0	0	0	7.89	0.68	10	26.67	8.33	3.85	0	0	0	0	0	0	0
LUZP4	chrX	3.08	0	0.47	0	0	0	0	2.38	2.97	0	0.78	1.48	0.56	2.33	1.39	0.53	5.41	3.42	0.88	1.35	0	2.22	0.76	0	0	0	0	0	11.11	12.5	8.2
SPANXN3	chrX	1.54	0.86	1.89	2.86	0	2	4.08	10.71	0.99	1.33	3.88	10.37	0.56	2.33	2.78	0.53	0	2.56	0.88	4.73	0	1.11	0	1.28	0	0	0	0	0	1.25	3.28
XAGE5	chrX	2.31	0	0	0.57	0	0	0	0	0	0	0	1.48	0	2.33	5.56	0	5.41	3.42	2.63	4.73	0	5.56	0	0	0	0	0	0	3.97	2.5	13.11
CT47A7	chrX	0.77	0	0	0	6.45	2	4.08	0	0	0	0	0	0	0	0	0	0	0	1.75	1.35	4.29	23.33	2.27	0	0	0	0	0	0	0	3.28
CPXCR1	chrX	0	0	0	0	3.23	0	0	0	0	1.33	0	0	0	1.16	0	0	0	0.85	3.51	0	0	0	12.12	0	2.63	0	0	5.13	0	0	0
MAGEB3	chrX	0.77	0	0.47	1.14	3.23	0	0	0	0.99	0	0	0	0	1.16	0	0	2.7	0.85	5.26	5.41	0	3.33	1.52	0	0	0	0	0	0	1.25	1.64
FTHL17	chrX	8.46	0	0	0.57	0	0	0	1.19	4.95	1.33	0	0	0	0	6.94	0	5.41	0	0	0	0	0	0	0	0	0	0	0	0	0	0
SPANXC	chrX	0	0.86	1.42	0.57	0	0	0	2.38	3.96	1.33	0	0	0	1.16	1.39	0.53	4.05	0.85	0	0	0	1.11	0	1.28	0	0	0	0	0.79	0	3.28
SSX7	chrX	0	0	0	0	9.68	0	0	0	0	0	0	1.48	0	0	0	0	0	0	0	0	0	10	0	1.28	0	0	0	0	0	0	0
MAGEB4	chrX	20.77	0.43	0	0	0	0	0	0	0	0	0	0	0	0	0	0	0	0	0	0	0	0	0	0	0	0	0	0	0	0	0
FAM46D	chrX	3.08	0	0	0.57	0	0	0	0	0	0	0	0	0	0	1.39	0	0	1.71	6.14	0.68	0	1.11	0.76	1.28	0	0	0	0	0.79	0	3.28
PAGE3	chrX	0	0	0.47	0.57	0	0	0	0	0.99	0	0	1.48	0	3.49	1.39	1.05	0	0.85	0.88	1.35	0	0	1.52	0	0	0	0	0	1.59	0	4.92
CT47A2	chrX	0	0	0	0	3.23	0	0	0	0.99	0	0	0	0	0	0	0.53	0	0.85	0.88	2.03	0	5.56	0	0	0	0	0	0	0.79	0	3.28
SPANXN4	chrX	0	0	0	0	0	0	0	0	0	0	0	0.74	0	1.16	1.39	0	0	0.85	0	1.35	0	1.11	1.52	1.28	0	0	0	0	0.79	1.25	3.28
CT47A6	chrX	0	0	0	0	3.23	0	0	0	0	0	0	0	0	0	0	0	0	0	0	0	0	4.44	0	0	0	0	0	0	0.79	3.75	1.64
CT47A11	chrX	0	0	0	0	3.23	0	0	0	0	0	0	0	0	1.16	0	0	0	0	0	0	0	8.89	0	0	0	0	0	0	0	0	0
CT47A1	chrX	0	0	0	0	3.23	0	0	0	0	0	0	0	0	0	1.39	0	0	0	0	0.68	0	4.44	0	0	0	0	0	0	0.79	1.25	0
CT47B1	chrX	0	0	0	0	0	0	0	0	0	0	0	0	0	1.16	1.39	0	0	0	0	0	0	3.33	0	0	0	0	0	0	1.59	2.5	1.64
SPANXN5	chrX	0	0	0	1.14	0	0	0	2.38	0.99	1.33	0	0	0	1.16	0	0	0	0.85	0	0	1.43	2.22	0	0	0	0	0	0	0	0	0
CT47A10	chrX	0	0	0	0	3.23	0	0	0	0	0	0	0	0	0	0	0	0	0	0	0	0	5.56	0	0	0	0	0	0	0.79	1.25	0
CT47A9	chrX	0	0	0	0	3.23	0	0	0	0	0	0	0	0	0	0	0	0	0	0	0	0	4.44	0	0	0	0	0	0	0.79	0	0
SPANXA2	chrX	0	0.43	1.42	0.57	0	0	0	0	0	0	0	0	0	0	0	0	1.35	0	0	0	0	1.11	0	1.28	0	0	0	0	0	0	1.64
SPANXN2	chrX	0	0	0	0	0	0	2.04	0	0	0	0	0	0	0	0	0	0	0.85	0	0	0	1.11	0	1.28	0	0	0	0	0	2.5	0
AKAP4	chrX	0	0	0	0	3.23	2	0	0	0	0	0	0	0	0	0	0	0	0.85	0.88	0	0	0	0	0	0	0	0	0	0	0	0
SPANXN1	chrX	0	0	0	0	0	0	0	0	0	0	0	0	0	0	0	0	0	0	0	0	0	0	0	1.28	0	0	0	0	0	0	4.92
SPANXE	chrX	0	0	0	0	0	0	0	0	0	0	0	0	0	0	0	0	1.35	0	0	0	0	0	0	1.28	0	0	0	0	0	0	3.28
ZNF645	chrX	0	0	0	0	0	0	0	0	0	0	0	0	0	0	0	0	0	0	0	0	1.43	2.22	1.52	0	0	0	0	0	0	0	0
TFDP3	chrX	0	0	0	0	0	0	0	0	0	0	0	0	0	0	0	0	0	0	0	0	0	0	0	0	0	0	0	0	1.59	1.25	0
PRAME	chr22	52.31	10.34	21.7	21.71	0	0	0	15.48	21.78	28	5.43	40.74	4.49	17.44	50	12.11	36.49	77.78	80.7	84.46	98.57	98.89	98.48	87.18	0	7.89	2.86	2.56	94.44	97.5	96.72
ACTL8	chr1	60.77	12.93	23.11	42.86	64.52	48	53.06	16.67	15.84	32	5.43	8.89	2.81	15.12	18.06	8.42	20.27	29.06	53.51	39.19	12.86	64.44	15.15	25.64	0	2.63	0	0	11.11	16.25	13.11
HORMAD1	chr1	70.77	1.29	0.47	2.86	0	4	4.08	29.76	49.5	42.67	0	0	0	41.86	50	28.95	35.14	54.7	5.26	2.7	4.29	11.11	2.27	8.97	0	0	0	0	20.63	21.25	24.59
TEX15	chr8	13.85	0	0.94	0.57	0	0	0	2.38	7.92	28	41.86	35.56	51.12	13.95	13.89	2.11	0	15.38	22.81	6.08	0	11.11	1.52	6.41	5.26	7.89	2.86	7.69	17.46	20	22.95
LEMD1	chr1	17.69	0	0	0	9.68	6	10.2	10.71	5.94	16	0	0	0	12.79	1.39	17.37	21.62	3.42	59.65	54.05	11.43	31.11	6.06	11.54	2.63	2.63	0	0	0	0	0
CAGE1	chr6	15.38	0	0	1.14	6.45	6	4.08	25	44.55	34.67	0	0	0	10.47	6.94	4.74	32.43	38.46	6.14	14.19	0	7.78	6.06	6.41	2.63	0	0	0	0	0	1.64
SLCO6A1	chr5	4.62	0.43	1.42	3.43	0	0	0	8.33	19.8	9.33	0.78	5.19	0.56	12.79	20.83	8.42	10.81	7.69	26.32	12.16	10	32.22	16.67	11.54	0	0	0	5.13	3.17	2.5	16.39
TPTE	chr21	3.85	0.43	3.77	8	3.23	1	2.04	3.57	4.95	2.67	0	0	0	13.95	20.83	1.58	6.76	7.69	6.14	6.76	5.71	23.33	15.91	12.82	0	0	0	2.56	27.78	15	40.98
SPACA3	chr17	1.54	0	0.94	0	51.61	59	6.12	1.19	0	2.67	0.78	1.48	0	15.12	2.78	8.95	4.05	0	6.14	2.7	0	5.56	1.52	2.56	0	0	0	0	15.08	27.5	3.28
MORC1	chr3	3.85	0	0.94	0	3.23	0	6.12	0	0	4	0	2.22	0	0	4.17	0	5.41	11.97	3.51	3.38	4.29	1.11	2.27	1.28	13.16	21.05	25.71	35.9	21.43	21.25	22.95
BRDT	chr1	0	5.17	11.79	5.14	0	0	0	7.14	9.9	21.33	0	0	0	25.58	43.06	28.95	16.22	19.66	0.88	0.68	0	3.33	0	2.56	0	0	0	0	0	0	0
CTCFL	chr20	0.77	0	0	0	3.23	3	0	0	1.98	6.67	0	0	0	1.16	6.94	0	2.7	16.24	45.61	37.84	0	36.67	0	3.85	0	0	0	0	10.32	5	11.48
NLRP4	chr19	0.77	0.43	0	0	3.23	1	0	2.38	2.97	6.67	0	1.48	0	4.65	5.56	1.58	6.76	3.42	15.79	8.11	0	14.44	2.27	6.41	10.53	13.16	11.43	25.64	13.49	5	14.75
BAGE	chr21	0	0.86	2.36	4.57	3.23	0	0	2.38	4.95	1.33	0	0	0	11.63	18.06	0.53	9.46	11.11	4.39	5.41	0	8.89	1.52	0	0	0	0	0	25.4	8.75	45.9
PRSS50	chr3	0.77	0	0	0	0	0	0	0	0.99	4	0	1.48	0	1.16	5.56	1.05	6.76	14.53	34.21	18.24	10	35.56	3.79	6.41	0	0	0	0	0.79	1.25	3.28
MAEL	chr1	7.69	0.86	1.42	2.29	0	1	0	0	0	2.67	3.1	1.48	1.12	4.65	6.94	1.05	2.7	5.13	0	1.35	0	2.22	0	2.56	31.58	2.63	17.14	12.82	7.94	3.75	11.48
DPPA2	chr3	1.54	0	0	1.14	0	0	0	8.33	14.85	5.33	0	1.48	1.12	4.65	12.5	0.53	16.22	18.8	10.53	8.78	0	5.56	0.76	14.1	0	0	0	0	0.79	1.25	6.56
PRSS54	chr16	2.31	0	0	0	6.45	1	0	1.19	0	0	0	0	0	0	0	0	0	0	0	0	10	12.22	9.85	5.13	13.16	10.53	8.57	48.72	0	1.25	0
DKKL1	chr19	4.62	0.43	2.36	1.14	0	0	0	0	0.99	1.33	0	0.74	0	2.33	5.56	2.63	0	5.98	10.53	5.41	11.43	20	9.09	6.41	0	2.63	2.86	0	0	5	4.92
CALR3	chr19	1.54	0.43	0.47	3.43	0	0	0	1.19	0	0	0	1.48	0	3.49	5.56	2.11	0	6.84	11.4	5.41	4.29	21.11	18.18	5.13	0	0	0	5.13	1.59	1.25	1.64
POTEC	chr18	0	15.09	13.68	9.71	3.23	1	0	0	0	2.67	0	0	0	0	0	0	0	0.85	14.04	18.92	0	6.67	1.52	0	0	0	0	0	0.79	1.25	0
POTEH	chr22	0.77	1.29	1.89	2.86	3.23	1	2.04	1.19	0	1.33	0	0	0	0	1.39	0	0	2.56	7.02	2.7	8.57	15.56	21.21	7.69	0	0	0	0	0.79	1.25	3.28
TEX14	chr17	4.62	10.34	22.17	11.43	0	0	0	0	0	0	0	0	0	1.16	4.17	0	0	0	0.88	0	0	0	0.76	1.28	0	7.89	0	0	6.35	7.5	3.28
RBM46	chr4	2.31	0.43	0	1.71	0	0	0	0	0.99	0	4.65	14.81	9.55	3.49	6.94	0.53	2.7	6.84	2.63	2.03	0	0	0.76	1.28	2.63	0	2.86	2.56	0	1.25	8.2
TSPY2	chrY	0	0	0	0	0	1	0	3.57	2.97	0	0	0	0	4.65	9.72	0.53	5.41	12.82	0	0	0	2.22	0.76	0	0	2.63	0	0	8.73	3.75	18.03
SEMG1	chr20	0.77	0	0	0.57	3.23	4	48.98	0	0	0	0	0	0	0	0	0.53	0	0	0	0	0	0	0	0	0	0	0	0	0	1.25	1.64
TSPY3	chrY	0	0	0	0	0	0	0	1.19	2.97	0	0	0	0	3.49	9.72	0	4.05	11.97	0	0	0	2.22	0.76	0	0	0	0	0	3.97	3.75	8.2
THEG	chr19	6.92	1.29	2.83	5.14	0	0	0	4.76	5.94	0	0	0.74	0	5.81	2.78	2.11	4.05	4.27	0	0.68	0	0	0	0	0	0	0	0	0	1.25	0
POTED	chr21	0	9.48	9.91	2.86	3.23	1	0	0	0	0	0	0	0	0	1.39	0	0	0	1.75	0.68	0	4.44	3.03	0	0	0	0	0	2.38	1.25	6.56
POTEA	chr8	1.54	0	0.47	0	0	1	0	1.19	1.98	0	1.55	0.74	0	0	2.78	1.05	4.05	5.13	4.39	3.38	0	8.89	2.27	0	0	0	0	0	0	0	1.64
ODF3	chr11	0.77	0.43	1.42	0	6.45	0	2.04	0	0	0	0	0.74	1.12	0	1.39	0	0	0.85	8.77	4.05	1.43	4.44	5.3	0	0	0	0	0	0	0	1.64
ADAM2	chr8	0	0.86	3.77	6.29	0	0	0	0	0	0	0	0	0	2.33	12.5	0	0	0	0	0	0	1.11	2.27	3.85	0	0	0	0	0	0	0
SPO11	chr20	0	0	0.94	0	0	0	8.16	1.19	0	2.67	0	1.48	0	0	1.39	0	1.35	0.85	1.75	2.7	0	2.22	0	0	0	0	0	0	0	0	0
C21orf99	chr21	0.77	0	0.47	0	3.23	0	0	0	0	0	0	2.22	0	2.33	0	1.05	0	0.85	0	0	1.43	3.33	0.76	0	0	0	0	0	0	0	0
SYCP1	chr1	2.31	2.59	0.47	5.14	0	0	0	0	0	1.33	0	0	0	0	0	0	0	0	0.88	0	0	0	0	0	0	0	0	0	0.79	0	0
LIPI	chr21	0.77	1.29	0.47	0.57	0	0	0	0	0	0	0	7.41	0	1.16	0	0.53	0	0.85	0	0	0	0	0	0	0	0	0	0	0	0	0
PRM1	chr16	0.77	0	0	0	3.23	0	0	0	0	0	0	0	0	0	0	1.05	0	0	0	1.35	0	1.11	1.52	0	0	0	0	2.56	0	0	0
ODF1	chr8	0	0	0.47	0	3.23	0	0	0	0	0	0	0	0	0	1.39	0	0	0	0.88	0	0	1.11	1.52	0	0	0	0	0	0	0	0
ADAM29	chr4	0.77	3.45	2.36	0	0	0	0	0	0	0	0	0	0	0	1.39	0	0	0	0	0	0	0	0	0	0	0	0	0	0	0	0
POTEB	chr15	0	0	0	0	0	0	0	0	0	0	0	0	0	0	0	0	0	0	0.88	0	0	3.33	0.76	0	0	0	0	0	0	0	0
SPATA19	chr11	0	0	0	0	0	0	0	0	0	0	0	0	0	0	0	0	0	2.56	0	0.68	0	0	0	0	0	0	0	0	0	0	0
LDHC	chr11	0.77	0	0	0	0	0	0	0	0	0	0	0	0	0	0	0	0	0	0	0.68	0	0	0	0	0	0	0	0	0	1.25	0
CCDC54	chr3	0	0	0	0	0	0	0	0	0	0	0	0	0	0	1.39	0	0	0	0	0	0	0	0	0	0	0	0	0	0	0	0
CT62	chr15	0	0.43	0.94	0	0	0	0	0	0	0	0	0	0	0	0	0	0	0	0	0	0	0	0	0	0	0	0	0	0	0	0
ODF4	chr17	0	0	0	0	0	0	0	0	0	0	0	0	0	0	0	0	0	0	0	0	0	1.11	0	0	0	0	0	0	0	0	0
PRM2	chr16	0	0	0	0	0	0	0	0	0	0	0	0	0	0	0	0	0	0	0	0	0	0	0	0	0	0	0	0	0	0	0
TEX101	chr19	0	0	0	0	0	0	0	0	0	0	0	0	0	0	0	0	0	0	0	0	0	0	0	0	0	0	0	0	0	0	0
