# Supplementary material for: Отрицательные признаки множественности лиц в гражданском праве
Source: Oxford University Press journal article supplement (doi:10.1158/2326-6066.cir-13-0088), 2014-01-01
Supplement: 23266066cir130088-sup-tab5.xlsx [file 23266066cir130088-sup-tab5.xlsx]

## Sheet: Table.S3.correlation.Methyl.Exp
Supplemental Table S5. Correlation coefficient of CT gene expression and DNA methylation in cancers
probe	chr	location	gene	BRCA	HNSC	KIRC	LUAD	LUSC	UCEC	GBM	SKCM
cg02831668	X	133792599	PLAC1	-0.505	0.137	-0.017	-0.229	-0.085	0.108	-0.041	-0.077
cg07157700	X	133793475	PLAC1	-0.183	0.104	0.094	0.039	0.088	0.138	0.014	-0.1
cg10061736	X	133756545	PLAC1	0.35	-0.201	-0.126	-0.271	-0.282	-0.124	0.132	-0.036
cg14139065	X	133700574	PLAC1	-0.172	0.043	0.08	-0.111	-0.062	0.131	0.022	-0.008
cg14674582	X	133792282	PLAC1	-0.383	0.192	0.059	-0.238	-0.068	0.134	-0.252	-0.167
cg17073891	X	133792876	PLAC1	-0.447	0.2	0.044	-0.051	-0.073	0.205	-0.149	-0.085
cg13699139	X	151870085	MAGEA6	-0.061	-0.131	-0.055	-0.193	-0.223	-0.329	-0.399	-0.112
cg03849262	X	151935380	MAGEA3	-0.106	-0.26	-0.211	-0.139	-0.224	-0.32	-0.332	0.013
cg27041022	X	151935162	MAGEA3	-0.149	-0.159	-0.055	-0.221	-0.186	-0.201	-0.366	-0.05
cg27151361	X	151939710	MAGEA3	-0.26	0.065	-0.372	-0.165	-0.172	-0.115	0.091	0.081
cg00157034	X	151903752	CSAG1	-0.208	-0.238	-0.082	-0.428	-0.227	-0.159	0.084	-0.236
cg02504280	X	151904507	CSAG1	-0.27	-0.269	-0.18	-0.348	-0.096	-0.11	-0.123	-0.011
cg05101765	X	151902442	CSAG1	-0.228	-0.383	-0.208	-0.504	-0.486	-0.288	-0.135	-0.541
cg06878303	X	151903174	CSAG1	-0.22	-0.351	-0.166	-0.508	-0.413	-0.127	-0.216	-0.325
cg08341323	X	151903218	CSAG1	-0.211	-0.195	-0.247	-0.475	-0.217	-0.046	-0.149	-0.222
cg09141697	X	151903224	CSAG1	-0.216	-0.238	-0.154	-0.548	-0.263	-0.092	-0.272	-0.325
cg11153808	X	151903039	CSAG1	-0.199	-0.428	-0.154	-0.517	-0.426	-0.217	0.013	-0.498
cg11236244	X	151904510	CSAG1	-0.247	-0.244	-0.201	-0.258	-0.112	-0.056	-0.395	0.15
cg12857407	X	151903194	CSAG1	-0.211	-0.358	-0.2	-0.522	-0.444	-0.155	-0.302	-0.424
cg19992083	X	151904268	CSAG1	-0.174	-0.058	-0.106	-0.088	-0.08	-0.073	-0.071	-0.043
cg23403072	X	151902143	CSAG1	-0.154	-0.156	-0.161	-0.224	-0.183	-0.034	-0.039	-0.009
cg25308044	X	151909300	CSAG1	-0.061	-0.173	-0.19	-0.056	0.018	-0.193	-0.166	0.437
cg04765207	X	151883250	MAGEA2	-0.112	-0.435	-0.18	-0.514	-0.547	-0.282	-0.003	-0.393
cg20079335	X	151883293	MAGEA2	-0.217	-0.406	-0.215	-0.431	-0.551	-0.215	-0.171	-0.458
cg00157034	X	151903752	MAGEA12	-0.278	-0.378	-0.04	-0.454	-0.289	-0.133	0.103	-0.259
cg02504280	X	151904507	MAGEA12	-0.305	-0.159	-0.104	-0.344	-0.071	-0.137	-0.126	-0.105
cg05101765	X	151902442	MAGEA12	-0.319	-0.518	-0.13	-0.526	-0.513	-0.246	-0.112	-0.61
cg06878303	X	151903174	MAGEA12	-0.348	-0.516	-0.133	-0.521	-0.564	-0.068	-0.201	-0.447
cg08341323	X	151903218	MAGEA12	-0.317	-0.328	-0.161	-0.396	-0.379	-0.02	-0.119	-0.333
cg09141697	X	151903224	MAGEA12	-0.358	-0.386	-0.167	-0.515	-0.423	-0.076	-0.224	-0.444
cg11153808	X	151903039	MAGEA12	-0.329	-0.552	-0.116	-0.545	-0.523	-0.142	-0.065	-0.615
cg11236244	X	151904510	MAGEA12	-0.273	-0.067	-0.1	-0.271	-0.046	-0.052	-0.3	0.05
cg12857407	X	151903194	MAGEA12	-0.37	-0.507	-0.138	-0.565	-0.566	-0.11	-0.234	-0.548
cg19992083	X	151904268	MAGEA12	-0.211	-0.048	-0.163	-0.138	-0.138	-0.12	-0.04	-0.114
cg23403072	X	151902143	MAGEA12	-0.241	-0.335	-0.113	-0.205	-0.342	0.05	-0.041	-0.132
cg26953403	X	151900081	MAGEA12	-0.096	0.056	-0.074	0.138	0.035	0.156	-0.065	0.48
cg08448931	X	151080620	MAGEA4	0.113	0.089	-0.007	-0.082	-0.234	0.017	-0.025	0.084
cg12941426	X	151080481	MAGEA4	0.003	-0.097	-0.031	-0.365	-0.34	-0.333	-0.046	-0.161
cg13219833	X	151093358	MAGEA4	0.062	0.168	-0.023	-0.227	0.076	-0.036	-0.001	0.205
cg13661446	X	151093031	MAGEA4	0.218	0.293	0.007	-0.017	0.083	0.123	0.045	0.273
cg18521137	X	151086160	MAGEA4	-0.178	-0.282	-0.095	-0.403	-0.421	-0.227	0.052	-0.344
cg21045312	X	151080969	MAGEA4	-0.124	-0.324	-0.033	-0.426	-0.594	-0.479	0.055	-0.373
cg22497867	X	151081296	MAGEA4	-0.268	-0.465	-0.141	-0.552	-0.615	-0.642	0.092	-0.457
cg24137136	X	151081284	MAGEA4	-0.216	-0.392	-0.148	-0.523	-0.573	-0.61	0.09	-0.391
cg27514326	X	151081405	MAGEA4	-0.218	-0.479	-0.232	-0.48	-0.65	-0.579	0.106	-0.453
cg05031352	X	152486179	MAGEA1	-0.536	-0.501	-0.208	-0.654	-0.479	-0.418	-0.365	-0.573
cg05307865	X	152482021	MAGEA1	-0.271	-0.12	-0.256	-0.338	-0.095	-0.157	-0.184	-0.37
cg06712539	X	152482763	MAGEA1	-0.159	0.079	-0.205	-0.206	-0.014	0.029	-0.118	-0.004
cg10066681	X	152486172	MAGEA1	-0.551	-0.545	-0.216	-0.69	-0.528	-0.412	-0.38	-0.622
cg13494652	X	152486467	MAGEA1	-0.301	-0.091	-0.163	-0.486	-0.127	-0.226	-0.335	-0.254
cg15037594	X	152485215	MAGEA1	-0.278	-0.135	-0.204	-0.403	-0.334	-0.224	-0.216	-0.343
cg23776892	X	152485938	MAGEA1	-0.378	-0.399	-0.152	-0.563	-0.533	-0.345	-0.205	-0.53
cg26414720	X	152487462	MAGEA1	-0.245	-0.094	-0.087	-0.269	-0.027	-0.275	-0.079	-0.056
cg02504617	X	140992417	MAGEC1	-0.137	-0.125	-0.044	-0.226	-0.272	-0.155	-0.318	-0.209
cg03931619	X	140991599	MAGEC1	-0.244	-0.35	-0.188	-0.454	-0.464	-0.47	-0.437	-0.448
cg08276328	X	140990738	MAGEC1	-0.111	0.048	-0.006	-0.283	-0.238	-0.096	-0.003	0.215
cg09140084	X	140990878	MAGEC1	-0.137	-0.098	-0.023	-0.274	-0.197	-0.241	-0.262	0.198
cg11110686	X	140991714	MAGEC1	-0.263	-0.476	-0.123	-0.506	-0.597	-0.488	-0.478	-0.548
cg12614283	X	140991045	MAGEC1	-0.183	-0.131	0.058	-0.281	-0.286	-0.173	-0.215	0.128
cg20470136	X	140996275	MAGEC1	-0.068	0.081	-0.054	-0.176	-0.101	-0.013	-0.225	0.287
cg24761827	X	140997122	MAGEC1	-0.22	0.02	-0.107	-0.081	-0.006	-0.044	-0.202	0.223
cg25651984	X	140991592	MAGEC1	-0.199	-0.248	-0.105	-0.372	-0.456	-0.36	-0.408	-0.374
cg03793368	X	141293344	MAGEC2	-0.402	-0.327	-0.159	-0.361	-0.54	-0.237	-0.253	-0.399
cg04064672	X	141290567	MAGEC2	-0.405	-0.157	-0.225	-0.382	-0.393	0.01	-0.213	0.103
cg05257372	X	141291755	MAGEC2	-0.596	-0.529	-0.45	-0.62	-0.492	-0.472	-0.44	-0.155
cg07549474	X	141293862	MAGEC2	-0.381	-0.159	-0.114	-0.352	-0.353	-0.11	-0.141	0.148
cg09929941	X	141293094	MAGEC2	-0.516	-0.523	-0.416	-0.597	-0.599	-0.442	-0.366	-0.47
cg10739728	X	141293118	MAGEC2	-0.523	-0.51	-0.432	-0.605	-0.712	-0.428	-0.468	-0.575
cg12109000	X	141292903	MAGEC2	-0.564	-0.483	-0.481	-0.57	-0.506	-0.479	-0.382	-0.692
cg15602735	X	141293333	MAGEC2	-0.457	-0.308	-0.23	-0.392	-0.588	-0.18	-0.26	-0.398
cg20333412	X	141293113	MAGEC2	-0.547	-0.555	-0.397	-0.632	-0.714	-0.453	-0.444	-0.642
cg23813564	X	141293020	MAGEC2	-0.651	-0.498	-0.497	-0.632	-0.606	-0.696	-0.266	-0.711
cg26465522	X	141293131	MAGEC2	-0.541	-0.468	-0.409	-0.572	-0.686	-0.384	-0.451	-0.536
cg04950711	X	151306718	MAGEA10	-0.106	-0.307	-0.173	-0.407	-0.574	-0.433	-0.145	-0.372
cg05215305	X	151307813	MAGEA10	-0.045	-0.179	-0.062	-0.24	-0.187	-0.168	-0.173	-0.066
cg11852358	X	151307112	MAGEA10	-0.063	-0.34	-0.055	-0.41	-0.436	-0.392	-0.157	-0.313
cg13492609	X	151308320	MAGEA10	0.074	-0.12	-0.051	-0.031	-0.023	-0.275	-0.159	0.202
cg13994408	X	151307730	MAGEA10	0.027	-0.131	-0.066	-0.09	0.077	-0.058	-0.067	0.143
cg15764264	X	151303631	MAGEA10	0.128	0.123	-0.086	-0.022	0.056	0.142	-0.166	0.424
cg19964192	X	151307053	MAGEA10	-0.401	-0.559	-0.205	-0.631	-0.663	-0.562	-0.322	-0.582
cg25549519	X	151306094	MAGEA10	-0.029	-0.155	-0.015	-0.158	-0.218	0.134	-0.134	-0.109
cg26982030	X	151307018	MAGEA10	-0.357	-0.534	-0.233	-0.629	-0.693	-0.527	-0.348	-0.554
cg02211783	X	115594827	CXorf61	0.025	-0.094	-0.001	-0.106	-0.076	0.004	0	-0.112
cg03859891	X	115594168	CXorf61	-0.629	-0.66	-0.162	-0.759	-0.712	-0.408	0	-0.451
cg11629919	X	115594200	CXorf61	-0.631	-0.682	-0.216	-0.815	-0.754	-0.329	0	-0.445
cg17155263	X	115594046	CXorf61	-0.313	-0.38	-0.101	-0.657	-0.658	-0.265	0	-0.225
cg19500599	X	115594970	CXorf61	0.001	-0.113	-0.077	-0.163	0.017	-0.067	0	-0.104
cg19974994	X	115594157	CXorf61	-0.58	-0.584	-0.129	-0.701	-0.683	-0.314	0	-0.364
cg24748294	X	115594209	CXorf61	-0.597	-0.552	-0.153	-0.696	-0.672	-0.344	0	-0.374
cg25720114	X	115594217	CXorf61	-0.47	-0.47	-0.181	-0.59	-0.626	-0.237	0	-0.326
cg26012731	X	115594180	CXorf61	-0.635	-0.625	-0.187	-0.758	-0.699	-0.462	0	-0.458
cg27623334	X	115594242	CXorf61	-0.363	-0.475	-0.173	-0.586	-0.595	-0.214	0	-0.263
cg02369904	X	26212857	MAGEB6	-0.226	-0.34	-0.294	-0.326	-0.384	-0.42	-0.219	-0.267
cg04730443	X	26210529	MAGEB6	-0.186	-0.315	-0.233	-0.193	-0.451	-0.333	-0.016	-0.247
cg06431611	X	26210408	MAGEB6	-0.354	-0.299	-0.29	-0.3	-0.351	-0.334	-0.108	-0.386
cg06778013	X	26210302	MAGEB6	-0.284	-0.258	-0.268	-0.299	-0.345	-0.366	-0.002	-0.259
cg10127415	X	26210523	MAGEB6	-0.179	-0.269	-0.162	-0.129	-0.397	-0.344	-0.054	-0.181
cg14513082	X	26210574	MAGEB6	-0.305	-0.464	-0.235	-0.346	-0.661	-0.441	-0.155	-0.457
cg16122592	X	26210712	MAGEB6	-0.238	-0.405	-0.322	-0.263	-0.563	-0.376	-0.262	-0.239
cg20495640	X	26209436	MAGEB6	-0.225	-0.299	-0.298	-0.229	-0.377	-0.315	-0.223	-0.18
cg22705131	X	26210609	MAGEB6	-0.335	-0.63	-0.304	-0.385	-0.692	-0.508	-0.047	-0.491
cg01078565	X	30233575	MAGEB2	-0.317	-0.693	-0.452	-0.616	-0.614	-0.426	-0.058	-0.754
cg04646630	X	30233581	MAGEB2	-0.374	-0.683	-0.329	-0.525	-0.667	-0.384	-0.068	-0.747
cg10079981	X	30237018	MAGEB2	-0.095	-0.012	-0.26	-0.087	-0.013	-0.144	-0.121	-0.149
cg10172210	X	30233295	MAGEB2	-0.108	-0.195	-0.243	-0.262	-0.434	-0.176	-0.041	-0.37
cg11291200	X	30233490	MAGEB2	-0.247	-0.394	-0.135	-0.234	-0.52	-0.35	0.058	-0.527
cg15167807	X	30233571	MAGEB2	-0.277	-0.64	-0.306	-0.501	-0.599	-0.408	-0.11	-0.704
cg15715746	X	30233589	MAGEB2	-0.39	-0.672	-0.3	-0.534	-0.657	-0.396	-0.122	-0.747
cg17299712	X	30233762	MAGEB2	-0.134	-0.356	-0.307	-0.296	-0.497	-0.306	0.006	-0.53
cg17618474	X	30233227	MAGEB2	-0.177	-0.172	-0.248	-0.172	-0.296	-0.167	-0.082	-0.379
cg26395098	X	30233603	MAGEB2	-0.315	-0.592	-0.235	-0.445	-0.605	-0.371	0.019	-0.667
cg01906102	X	48126547	SSX1	-0.351	-0.113	-0.344	-0.363	-0.255	-0.102	0.019	0.227
cg17158811	X	48114838	SSX1	-0.304	-0.195	-0.368	-0.427	-0.368	0.003	0.112	0.107
cg19585882	X	48115024	SSX1	-0.268	-0.096	-0.365	-0.406	-0.35	-0.078	0.027	0.094
cg25368212	X	48114506	SSX1	-0.435	-0.127	-0.256	-0.4	-0.329	-0.19	-0.002	-0.216
cg27533859	X	48124969	SSX1	-0.205	0.222	-0.158	-0.137	-0.006	-0.037	-0.019	0.377
cg00290944	X	55101346	PAGE2B	-0.167	-0.209	-0.139	-0.258	-0.371	-0.284	-0.139	-0.341
cg00675244	X	55100096	PAGE2B	-0.112	-0.119	-0.087	-0.16	-0.225	-0.015	-0.089	-0.248
cg02490931	X	55101410	PAGE2B	-0.22	-0.297	-0.254	-0.4	-0.583	-0.341	-0.083	-0.54
cg07274922	X	55102690	PAGE2B	-0.068	-0.154	-0.137	-0.19	-0.265	0.043	0.053	-0.152
cg07413956	X	55101460	PAGE2B	-0.224	-0.333	-0.162	-0.425	-0.52	-0.315	0.045	-0.545
cg13011976	X	55101289	PAGE2B	-0.218	-0.2	-0.177	-0.343	-0.431	-0.376	-0.008	-0.359
cg18431579	X	55101509	PAGE2B	-0.135	-0.175	-0.228	-0.349	-0.35	-0.392	-0.123	-0.512
cg18983126	X	55101351	PAGE2B	-0.198	-0.236	-0.224	-0.35	-0.435	-0.404	-0.003	-0.488
cg19744943	X	55101639	PAGE2B	-0.174	-0.164	-0.047	-0.365	-0.453	-0.288	-0.182	-0.461
cg20228978	X	55101448	PAGE2B	-0.095	-0.189	-0.076	-0.268	-0.243	-0.345	0.116	-0.294
cg26239772	X	55101301	PAGE2B	-0.156	-0.214	-0.095	-0.303	-0.451	-0.375	0.043	-0.362
cg27492220	X	55101327	PAGE2B	-0.206	-0.235	-0.071	-0.387	-0.441	-0.345	-0.03	-0.406
cg12814244	X	101567274	NXF2	-0.03	-0.194	-0.138	-0.111	-0.112	-0.016	-0.256	-0.054
cg12922305	X	101541177	NXF2	-0.076	0.077	0.011	0.151	0.051	0.033	-0.097	-0.049
cg01133413	X	55246758	PAGE5	-0.167	-0.043	-0.11	-0.24	-0.08	0.001	-0.164	-0.608
cg04303560	X	55249036	PAGE5	0.077	0.094	0.018	-0.045	-0.113	0.076	-0.113	0.15
cg07445326	X	55245320	PAGE5	-0.053	0.006	-0.152	-0.11	0.05	-0.019	-0.09	-0.044
cg10162698	X	55245347	PAGE5	-0.077	-0.089	-0.156	-0.276	-0.01	-0.143	-0.034	-0.251
cg13837202	X	55246977	PAGE5	-0.107	-0.077	-0.179	-0.243	-0.147	-0.182	-0.033	-0.445
cg13991029	X	55246455	PAGE5	-0.164	-0.112	-0.248	-0.281	-0.148	-0.211	-0.076	-0.657
cg16975981	X	55246829	PAGE5	-0.163	-0.155	-0.247	-0.246	-0.174	-0.122	-0.067	-0.524
cg22824741	X	55246764	PAGE5	-0.174	-0.144	-0.323	-0.24	-0.318	-0.168	-0.01	-0.708
cg27548655	X	55247168	PAGE5	-0.061	0.047	-0.091	-0.17	-0.239	-0.047	-0.115	-0.344
cg04227026	X	150884661	FATE1	0.158	0.173	-0.2	-0.094	0.134	0.093	0.184	0.148
cg08177445	X	150884746	FATE1	0.116	0.104	-0.211	-0.086	0.068	0.073	0.086	0.074
cg08421550	X	150883777	FATE1	0.171	0.236	-0.185	-0.072	0.23	-0.006	0.137	0.204
cg12528673	X	150891593	FATE1	0.072	0.201	-0.054	-0.117	0.336	0.065	0.198	0.171
cg24822127	X	150884331	FATE1	0.135	0.181	-0.289	-0.081	0.015	0.037	0.131	0.107
cg00772962	X	49295370	GAGE12F	-0.014	0	-0.141	0.01	-0.042	-0.359	0	0.106
cg02540297	X	49297285	GAGE12F	-0.079	0	-0.114	-0.085	-0.251	-0.428	0	-0.203
cg04886382	X	49333935	GAGE12F	-0.01	0	-0.043	-0.043	0.005	-0.277	0	0.052
cg05439258	X	49220271	GAGE12F	0.038	0	-0.085	0.01	0.019	-0.215	0	0.084
cg06256374	X	49217059	GAGE12F	-0.097	0	-0.195	-0.185	-0.211	-0.424	0	-0.187
cg10466938	X	49301901	GAGE12F	-0.024	0	-0.088	-0.02	0.056	-0.196	0	-0.001
cg13281118	X	49229672	GAGE12F	-0.013	0	-0.058	-0.074	0.028	-0.18	0	0.05
cg15754755	X	49215448	GAGE12F	-0.042	0	-0.124	-0.101	-0.115	-0.395	0	0.016
cg20503077	X	49236806	GAGE12F	-0.11	0	-0.161	-0.2	-0.229	-0.401	0	-0.194
cg20676303	X	49217045	GAGE12F	-0.106	0	-0.195	-0.152	-0.254	-0.441	0	-0.166
cg21184257	X	49234767	GAGE12F	-0.016	0	-0.108	-0.021	0.032	-0.264	0	0.072
cg24802193	X	52255505	XAGE1D	-0.134	-0.013	-0.064	0.267	0.356	-0.126	0.078	0.184
cg00372774	22	22902198	PRAME	-0.257	-0.441	-0.08	-0.438	-0.521	-0.473	-0.159	-0.315
cg01966129	22	22901880	PRAME	-0.496	-0.536	-0.533	-0.4	-0.597	-0.46	-0.232	-0.477
cg04242655	22	22902047	PRAME	-0.421	-0.521	-0.245	-0.532	-0.762	-0.569	-0.316	-0.524
cg05208878	22	22901596	PRAME	-0.388	-0.078	-0.392	-0.517	-0.45	-0.428	-0.209	-0.423
cg07969622	22	22901569	PRAME	-0.492	-0.152	-0.414	-0.578	-0.598	-0.426	-0.172	-0.561
cg08831999	22	22901697	PRAME	-0.385	-0.169	-0.18	-0.466	-0.469	-0.448	-0.278	-0.352
cg11225751	22	22901661	PRAME	-0.49	-0.168	-0.398	-0.532	-0.467	-0.414	-0.344	-0.333
cg16932094	22	22902237	PRAME	-0.255	-0.479	0.035	-0.346	-0.496	-0.488	-0.211	-0.468
cg17336139	22	22901648	PRAME	-0.456	-0.062	-0.287	-0.529	-0.425	-0.439	-0.337	-0.375
cg17648213	22	22899164	PRAME	-0.059	0.457	-0.021	-0.077	0.043	-0.622	-0.163	-0.579
cg19253577	22	22904270	PRAME	0.146	0.198	0.038	0.048	0.058	0.3	-0.15	0.287
cg19804859	22	22901145	PRAME	-0.364	-0.422	-0.216	-0.494	-0.654	-0.493	-0.245	-0.379
cg20667684	22	22901857	PRAME	-0.523	-0.623	-0.6	-0.475	-0.667	-0.448	-0.26	-0.498
cg22871485	22	22901830	PRAME	-0.535	-0.628	-0.47	-0.564	-0.687	-0.5	-0.183	-0.437
cg27303185	22	22901267	PRAME	-0.575	-0.503	-0.539	-0.655	-0.793	-0.648	-0.433	-0.556
cg02772379	1	18149599	ACTL8	0.108	-0.043	-0.077	-0.14	0.013	-0.079	0.07	0.062
cg03220543	1	18092930	ACTL8	0.16	0.067	-0.127	0.094	0.125	0.233	-0.062	0.155
cg06687562	1	18081775	ACTL8	-0.081	-0.119	0.008	-0.205	-0.046	-0.235	-0.147	-0.069
cg07121807	1	18152750	ACTL8	0.347	0.037	0.052	-0.054	-0.168	0.102	0.306	-0.025
cg08651730	1	18149714	ACTL8	0.179	0.062	0.077	-0.086	0.15	0.024	0.151	0.149
cg08734527	1	18092835	ACTL8	0.237	-0.068	-0.143	-0.084	0.077	0.19	0.06	0.099
cg09821328	1	18152144	ACTL8	0.195	0.055	-0.006	-0.067	0.101	0.099	0.06	0.094
cg09941542	1	18081025	ACTL8	0.013	-0.055	-0.12	-0.168	-0.13	-0.001	-0.101	-0.021
cg10376517	1	18153059	ACTL8	0.067	-0.006	-0.081	-0.235	-0.226	-0.188	0.104	-0.001
cg17142039	1	18149651	ACTL8	0.188	-0.028	0.118	-0.158	0.138	-0.037	0.029	0.102
cg19685066	1	18082003	ACTL8	-0.14	-0.241	-0.143	-0.244	-0.209	-0.085	-0.21	-0.147
cg20699305	1	18152403	ACTL8	0.224	0.064	0.121	-0.174	0.044	-0.037	-0.034	0.104
cg20796611	1	18152639	ACTL8	0.311	-0.01	0.106	-0.1	-0.023	-0.031	0.272	-0.025
cg00935819	1	150672619	HORMAD1	0.082	0.014	-0.01	-0.028	0.1	0.141	0.068	0.164
cg04725313	1	150687316	HORMAD1	0.024	0.025	-0.096	0.023	0.091	0.052	0.208	0.109
cg05125051	1	150693375	HORMAD1	-0.333	0.058	-0.014	0.035	0.208	-0.168	0.096	-0.223
cg06893172	1	150693383	HORMAD1	-0.349	0.064	-0.089	0.018	0.138	-0.207	0.064	-0.232
cg09034736	1	150693464	HORMAD1	-0.217	0.283	0.023	0.215	0.28	-0.057	0.046	0.049
cg09059988	1	150693299	HORMAD1	-0.168	0.004	0.095	-0.197	-0.103	-0.231	0.065	-0.13
cg15069995	1	150692971	HORMAD1	-0.291	0.116	0.025	0.03	0.099	-0.147	0.28	-0.229
cg20767356	1	150693100	HORMAD1	-0.349	-0.01	-0.021	-0.023	0.138	-0.178	0.081	-0.246
cg22823121	1	150693482	HORMAD1	-0.228	0.359	0.103	0.296	0.346	-0.075	0.036	0.029
cg00831770	8	30707156	TEX15	0.289	0.172	-0.055	0.121	0.138	0.262	0.038	0.466
cg19418958	8	30705886	TEX15	0.341	0.297	0.149	0.333	0.316	0.529	-0.006	0.453
cg20939319	8	30707701	TEX15	0.311	0.327	0.063	0.317	0.283	0.485	0.197	0.592
cg26631437	8	30691170	TEX15	0.195	0.304	0.077	0.211	0.259	0.409	0.034	0.546
cg01364826	1	205392200	LEMD1	0.516	0.376	0.095	0.418	0.333	0.292	-0.182	0.071
cg01416657	1	205392241	LEMD1	0.494	0.247	0.176	0.384	0.243	0.244	-0.268	0.059
cg10092691	1	205391796	LEMD1	0.465	0.13	0.007	0.178	0.126	0.176	-0.123	0.095
cg10951289	1	205391381	LEMD1	0.072	0.274	0.065	0.017	0.111	0.136	-0.028	0.079
cg15524283	1	205350519	LEMD1	-0.08	0.047	0.021	-0.143	-0.01	0.096	0.165	0.12
cg16328456	1	205390937	LEMD1	0.093	0.208	0.061	-0.063	0.197	0.295	0.08	0.017
cg00016802	6	7339455	CAGE1	0.103	0.121	0.117	-0.074	0.012	0.009	0.015	-0.146
cg02013957	6	7390716	CAGE1	0.019	0.048	-0.087	0.005	0.113	-0.059	0.01	-0.013
cg02478793	6	7388469	CAGE1	0.011	-0.078	0.037	0	0.121	0.046	0.192	-0.092
cg02548912	6	7362418	CAGE1	0.151	0.077	0.099	0.164	0.068	0.152	0.039	-0.017
cg03969138	6	7390163	CAGE1	0.064	0.125	-0.116	-0.015	-0.066	0.102	-0.1	0.013
cg05371005	6	7389895	CAGE1	-0.095	-0.031	-0.053	0.028	0.099	0.063	-0.24	-0.086
cg05781798	6	7386858	CAGE1	0.114	0.117	0.157	0.02	-0.001	0.127	0.056	-0.065
cg05896563	6	7390048	CAGE1	-0.046	-0.054	-0.024	0.097	0.017	0.132	-0.018	0.119
cg05907686	6	7389956	CAGE1	-0.035	-0.013	-0.042	-0.073	-0.081	-0.008	-0.164	0.04
cg07157058	6	7390083	CAGE1	0.009	0.116	-0.037	-0.068	-0.044	0.063	0.004	0.043
cg07900658	6	7389903	CAGE1	-0.056	-0.009	-0.009	0.147	0.171	0.073	0.118	-0.073
cg11100341	6	7344666	CAGE1	-0.037	0.095	0.048	-0.087	-0.078	-0.044	-0.026	0.03
cg11217567	6	7390340	CAGE1	-0.071	-0.01	0.027	0.114	0.117	0.12	0.018	-0.008
cg12850075	6	7344685	CAGE1	-0.008	0.1	0.057	-0.032	-0.069	-0.053	0.011	0.002
cg13654195	6	7390091	CAGE1	0.018	0.124	-0.058	-0.018	-0.048	0.037	0.042	-0.054
cg14457132	6	7389888	CAGE1	-0.052	0.053	-0.092	-0.027	0.053	-0.034	0.265	0.039
cg15324969	6	7389798	CAGE1	-0.005	0.04	-0.002	0.094	0.109	0.161	0.129	0.076
cg17559292	6	7329354	CAGE1	0.073	0.017	0.151	0.014	0.031	0.057	-0.023	-0.038
cg22450460	6	7389544	CAGE1	0.066	0.056	-0.042	0.067	0.068	0.138	-0.069	0.022
cg22804502	6	7389831	CAGE1	0.041	0	-0.067	0.104	0.069	0.086	-0.126	0.139
cg24520800	6	7389821	CAGE1	0.016	0.111	0.019	-0.025	0.03	0.098	-0.02	0.081
cg24929567	6	7390179	CAGE1	-0.017	0.012	-0.037	0.066	0.049	0.015	0.097	0.093
cg25551918	6	7390136	CAGE1	-0.036	0.002	-0.04	0.064	0.142	0.078	0.14	-0.056
cg27260630	6	7389879	CAGE1	-0.044	-0.016	-0.101	-0.009	0.042	0.069	-0.129	-0.106
cg00944166	5	101834675	SLCO6A1	-0.174	-0.044	-0.023	-0.159	0.14	0.119	-0.027	-0.224
cg04589881	5	101835072	SLCO6A1	0.021	-0.027	-0.119	-0.08	0.205	0.112	0.095	0.003
cg07704990	5	101834577	SLCO6A1	-0.126	-0.097	-0.1	-0.118	0.142	0.12	0.111	-0.181
cg08759899	5	101831271	SLCO6A1	-0.079	0.085	-0.032	-0.022	0.062	0.177	0.244	0.106
cg12583394	5	101827323	SLCO6A1	-0.04	-0.083	-0.008	-0.061	0.056	0.023	-0.14	-0.221
cg14719865	5	101834365	SLCO6A1	-0.1	-0.223	-0.086	-0.244	0.001	0.107	0.092	-0.172
cg16533977	5	101834136	SLCO6A1	-0.233	-0.161	-0.086	-0.307	-0.106	0.017	0.243	-0.121
cg26101428	5	101835664	SLCO6A1	0.007	0.193	0.017	-0.009	-0.027	0.057	0.147	0.148
cg26192556	5	101834780	SLCO6A1	-0.033	0.103	0.066	0.01	0.206	0.277	-0.006	-0.084
cg26398586	5	101834472	SLCO6A1	-0.138	-0.088	0.004	-0.214	0.07	-0.016	0.172	-0.262
cg01752628	17	31317382	SPACA3	0.088	-0.014	0.016	0.208	0.037	0.068	0.293	0.067
cg05527721	17	31320695	SPACA3	0.069	-0.044	0.033	0.245	-0.171	0.083	0.295	0.2
cg07704580	17	31324803	SPACA3	-0.009	0.018	-0.023	0.178	0.009	0.056	0.138	0.149
cg11161417	17	31319454	SPACA3	0.039	-0.03	-0.02	0.114	0.102	-0.001	0.326	0.032
cg12139542	17	31318779	SPACA3	0.029	0.041	0	0.213	-0.039	0.028	0.2	0.197
cg13813649	17	31317449	SPACA3	0.037	0.037	-0.022	0.179	0.117	0.113	0.264	0.059
cg25952886	17	31320651	SPACA3	0.038	0.023	0.043	0.118	-0.046	-0.02	0.19	0.104
cg26829529	17	31317536	SPACA3	0.089	0.023	0.013	0.251	0.273	0.128	0.407	0.102
cg04167867	3	108837130	MORC1	0.131	0.044	-0.031	-0.01	-0.188	0.066	0.106	0.077
cg05096681	3	108767055	MORC1	0.134	-0.079	0.099	-0.107	-0.165	-0.045	0.009	0.199
cg05148217	3	108836878	MORC1	0.098	0.029	0.036	-0.013	-0.081	0.012	0.16	0.051
cg07090057	3	108837484	MORC1	0.131	-0.045	0.076	-0.191	-0.19	-0.072	0.19	0.058
cg09242008	3	108839099	MORC1	0.19	0.088	0.16	-0.069	0.035	-0.023	0.391	0.139
cg09436190	3	108837052	MORC1	-0.001	-0.061	0.049	-0.187	-0.427	0.02	-0.174	-0.091
cg14566661	3	108837088	MORC1	0.013	-0.101	-0.006	-0.111	-0.332	0.042	0.082	-0.141
cg16259931	3	108836693	MORC1	0.081	0.043	0.014	-0.036	-0.077	-0.085	0.366	0.021
cg16903689	3	108833737	MORC1	0.128	0.053	0.025	-0.009	0.005	-0.001	0.125	0.175
cg18733433	3	108837086	MORC1	0.041	-0.026	0.04	-0.073	-0.382	0.015	0.046	-0.108
cg19857541	3	108836800	MORC1	0.188	0.05	0.129	-0.033	-0.104	-0.018	0.146	0.105
cg23550947	3	108836912	MORC1	-0.139	-0.069	0.064	-0.193	-0.438	0.09	-0.396	-0.185
cg25092670	3	108837620	MORC1	0.11	0.049	0.15	-0.166	-0.099	-0.024	0.261	0.097
cg25456186	3	108837069	MORC1	0.011	-0.023	0.046	-0.198	-0.361	0.017	-0.148	-0.127
cg26540808	3	108837066	MORC1	0.015	-0.002	0.034	-0.168	-0.393	-0.033	-0.21	-0.088
cg00307685	1	92415524	BRDT	0.074	-0.456	0	-0.481	-0.629	-0.088	-0.006	0.016
cg00308185	1	92414910	BRDT	-0.022	-0.363	-0.01	-0.639	-0.431	-0.138	0.018	0.031
cg01081438	1	92417998	BRDT	-0.091	0.093	0.05	0.007	-0.085	-0.086	0.033	-0.039
cg01515515	1	92414295	BRDT	0.135	-0.201	-0.017	-0.395	-0.281	0.038	-0.033	-0.097
cg02124149	1	92413007	BRDT	0.174	0.025	-0.038	0.225	0.054	0.101	-0.252	-0.076
cg02935097	1	92414782	BRDT	0.062	-0.216	-0.14	-0.504	-0.319	-0.078	0.032	0.009
cg03136151	1	92415048	BRDT	0.072	-0.364	-0.045	-0.519	-0.473	-0.022	-0.148	0.127
cg03421440	1	92414520	BRDT	0.034	-0.312	-0.158	-0.416	-0.436	-0.071	0.215	-0.068
cg04889749	1	92416676	BRDT	0.114	-0.023	0.012	-0.15	-0.248	-0.028	-0.055	0.103
cg06442199	1	92414344	BRDT	0.109	-0.261	-0.122	-0.437	-0.379	-0.016	0.015	-0.011
cg08172037	1	92414985	BRDT	0.072	-0.666	0.013	-0.713	-0.656	-0.069	0.074	0.105
cg09250199	1	92415145	BRDT	-0.007	-0.361	-0.049	-0.677	-0.464	-0.091	-0.143	0.116
cg13299824	1	92414737	BRDT	0.053	-0.41	-0.128	-0.454	-0.55	-0.049	0.04	-0.079
cg14732540	1	92414722	BRDT	0.042	-0.389	-0.223	-0.436	-0.555	-0.039	0.117	-0.085
cg19245011	1	92414221	BRDT	0.118	-0.126	-0.052	-0.368	-0.248	0.042	-0.002	-0.09
cg26315244	1	92416320	BRDT	0.058	-0.002	-0.033	-0.117	-0.075	0.056	0.06	0.095
cg12211074	20	56102501	CTCFL	0.034	-0.15	-0.045	-0.152	-0.254	-0.06	0.269	-0.282
cg14264994	20	56099548	CTCFL	-0.036	-0.161	0.001	-0.281	-0.743	-0.482	0.134	-0.376
cg15858483	20	56073589	CTCFL	0.021	0.303	0.002	0.344	0.461	0.536	-0.093	0.258
cg20273358	20	56100118	CTCFL	-0.039	-0.504	-0.038	-0.577	-0.681	-0.63	0.169	-0.61
cg20835555	20	56096875	CTCFL	0.011	0.227	0.043	-0.118	-0.103	0.215	0.099	0.04
cg25169524	20	56076737	CTCFL	-0.022	0.071	-0.046	-0.185	-0.282	0.026	0.045	0.091
cg25397426	20	56100021	CTCFL	0.103	-0.161	0.137	-0.012	-0.478	-0.629	0.164	-0.386
cg25721806	20	56099724	CTCFL	-0.084	-0.21	-0.001	-0.308	-0.592	-0.503	0.025	-0.437
cg00817731	3	46759475	PRSS50	-0.082	-0.254	0.014	0.081	-0.316	-0.123	0.126	-0.169
cg01788113	3	46759472	PRSS50	-0.082	-0.268	0.03	0.051	-0.313	-0.097	0.134	-0.192
cg01967580	3	46759656	PRSS50	-0.079	-0.314	-0.064	-0.016	-0.532	-0.197	-0.038	-0.173
cg02032097	3	46755916	PRSS50	0.041	-0.059	-0.274	-0.113	-0.023	-0.023	-0.083	-0.03
cg02834909	3	46759438	PRSS50	-0.084	-0.306	0.018	0.055	-0.415	-0.217	0.108	-0.205
cg04360233	3	46758813	PRSS50	0.102	-0.108	-0.052	0.043	-0.398	-0.003	0.02	0.092
cg05727070	3	46759698	PRSS50	-0.1	-0.382	-0.025	-0.019	-0.564	-0.325	-0.121	-0.266
cg07087960	3	46761555	PRSS50	0.077	-0.099	-0.093	0.089	-0.187	0.181	-0.03	0.127
cg13303179	3	46759335	PRSS50	-0.12	-0.38	0.046	-0.01	-0.543	-0.31	-0.029	-0.29
cg17460445	3	46759588	PRSS50	-0.104	-0.33	-0.014	0.043	-0.511	-0.194	-0.052	-0.201
cg19668234	3	46759449	PRSS50	-0.015	-0.198	-0.045	0.07	-0.363	-0.147	-0.059	-0.154
cg19875656	3	46759096	PRSS50	0.054	-0.223	-0.018	0.097	-0.534	-0.168	0.107	-0.064
cg00001349	1	166958439	MAEL	-0.162	-0.197	0.006	-0.218	-0.294	0.017	0.158	-0.275
cg10117884	1	166955898	MAEL	0.026	-0.094	0.057	-0.129	0.154	0.168	0.105	0.107
cg11336590	1	166958322	MAEL	-0.056	0.065	0.023	-0.12	0.075	0.137	-0.025	-0.056
cg13212575	1	166959030	MAEL	-0.031	0.169	0.026	-0.071	0.053	-0.017	0.289	0.136
cg13249256	1	166958581	MAEL	-0.275	-0.232	0.117	-0.289	-0.295	-0.095	0.248	-0.363
cg13480774	1	166958401	MAEL	-0.155	-0.152	0.135	-0.202	-0.171	0.12	0.294	-0.218
cg17757848	1	166958583	MAEL	-0.258	-0.263	0.125	-0.279	-0.292	-0.166	0.197	-0.36
cg18894878	1	166958221	MAEL	-0.058	-0.012	0.004	-0.142	-0.006	0.123	0.255	-0.193
cg19241352	1	166958389	MAEL	-0.174	-0.21	0.033	-0.308	-0.201	0.028	0.267	-0.377
cg23968893	1	166958308	MAEL	0.01	0.027	0.06	-0.026	0.12	0.161	0.296	0.015
cg24453820	1	166958273	MAEL	-0.087	-0.107	0.028	-0.268	-0.133	-0.006	0.244	-0.285
cg24586196	1	166958406	MAEL	-0.179	-0.235	-0.003	-0.28	-0.261	0.015	0.217	-0.378
cg26308818	1	166962376	MAEL	-0.018	0.08	0.06	0.038	0.113	0.156	0.062	0.245
cg27053975	1	166958233	MAEL	-0.076	0.061	0.081	-0.139	0.053	0.146	0.253	-0.096
cg04545516	20	43836061	SEMG1	0.068	-0.043	0.356	0.033	-0.018	0.123	0.031	0.138
cg05177629	20	43834580	SEMG1	0.034	0.019	0.434	0.05	0.113	0.129	0.148	0.093
cg10740895	20	43838292	SEMG1	0.027	0.023	0.322	0.099	-0.016	0.045	-0.037	0.053
cg11264863	20	43835661	SEMG1	-0.051	-0.084	0.156	-0.034	-0.032	0.012	0.017	0.032
cg20015689	20	43835190	SEMG1	0.068	0.027	0.445	0.057	0.077	0.15	0.123	0.106
