# Supplementary material for: Отрицательные признаки множественности лиц в гражданском праве
Source: Oxford University Press journal article supplement (doi:10.1158/2326-6066.cir-13-0088), 2014-01-01
Supplement: 23266066cir130088-sup-tab6.xlsx [file 23266066cir130088-sup-tab6.xlsx]

## Sheet: result.Coxph.CT.genes.8.tumors.
Supplemental Table S6. List of Coxph Regression P values of CT genes in eight cancer types
gene	BRCA	COAD	HNSC	KIRC	LUAD	LUSC	OV	UCEC
SPANXC	0.0787311	0.597557	0.000534611	1.98629e-06	0.0433984	0.690642	0.521084	0.343635
GAGE2A	0.311704	0.452007	0.730148	2.25811e-06	0.294068	0.124076	0.187595	0.00155754
SPANXN1	0.740738	1	0.111528	6.33672e-06	0.00158546	0.338223	0.732514	0.480246
MAGEB6	0.789676	0.447361	0.869909	1.29325e-05	0.387959	0.271297	0.660265	0.726408
SSX1	0.113343	0.81959	0.567204	2.01172e-05	0.0941426	0.270984	0.199836	0.0168902
PAGE1	0.639671	0.355649	0.713764	2.36452e-05	0.0479553	0.40967	0.77854	0.268342
CSAG2	0.782837	0.781055	0.0718626	2.43285e-05	0.454047	0.764655	0.996247	0.531191
PAGE2	0.4669	0.18136	0.899904	8.35476e-05	0.813472	0.20394	0.929727	0.792724
PAGE2B	0.171824	0.657389	0.291735	0.000103184	0.618606	0.968899	0.706719	0.973609
C21orf99	0.055032	0.634696	0.183932	0.000196486	0.476697	0.340262	0.559149	0.964768
SPANXB2	0.676563	0.533451	0.0055199	0.000272776	0.0303756	0.503872	0.671198	0.600913
MAGEB1	0.0469323	0.153508	0.0973671	0.000339353	0.769471	0.809435	0.610221	0.345941
SSX2	0.515049	0.918762	0.98712	0.000548639	0.717504	0.543939	0.454445	0.295749
SPANXE	0.154957	0.771447	0.000311059	0.000564068	0.0871109	0.61845	0.223121	0.826642
MAGEA3	0.551862	0.569069	0.172924	0.000595301	0.773671	0.373851	0.764281	0.460706
MAGEA10	0.883453	0.620878	0.341623	0.000728956	0.436865	0.504539	0.565918	0.380037
GAGE1	0.459816	0.284517	0.242744	0.000750757	0.0576076	0.57374	0.067027	0.000297288
SPANXA2	0.344881	0.890045	0.00638391	0.000781726	0.000304495	0.337629	0.826404	0.440192
FATE1	0.0576107	0.30132	0.797541	0.000960891	0.135968	0.101305	0.223576	0.573585
MAGEA2	0.431477	0.213466	0.438596	0.00106554	0.165959	0.176023	0.213796	0.869611
PAGE3	1	1	0.0799753	0.00137025	0.556359	0.177999	0.556194	0.538814
CXorf48	0.274772	0.601377	0.647122	0.00145931	0.84083	0.983888	0.277972	0.119935
XAGE1D	0.336385	0.31223	0.834528	0.00153697	0.260744	0.715586	0.581168	0.0837716
PLAC1	0.262895	0.506607	0.143987	0.00172686	0.379645	0.00753222	0.613153	0.0014917
LEMD1	0.502813	0.540498	0.289917	0.0024559	0.886752	0.331909	0.0773553	0.71939
GAGE8	0.248592	0.420228	0.807042	0.00313344	0.498893	0.0106134	0.537613	0.0125444
PRAME	0.482394	0.500135	0.997476	0.00322128	0.100576	0.241748	0.584427	0.247903
GAGE13	0.557271	0.240017	0.750332	0.00352319	0.249303	0.128531	0.296545	0.012068
SPANXN3	0.785926	0.473086	0.387161	0.00413789	0.420768	0.088039	0.106775	0.425754
MAGEC2	0.0434326	0.97096	0.542336	0.00427354	0.449251	0.44861	0.460857	0.118847
AKAP4	0.725987	0.712236	0.30495	0.00598422	0.386281	0.991859	0.82274	0.349646
GAGE4	0.427952	0.264232	0.417695	0.00649363	0.259361	0.428589	0.379609	0.0265381
ACTL8	0.970519	0.518949	0.103014	0.00708371	0.160169	0.417707	0.503854	0.0088569
PRSS50	0.524708	0.528885	0.782625	0.0106353	0.692935	0.0543312	0.871677	0.591924
MAGEA6	0.400683	0.349454	0.170696	0.0109459	0.26264	0.505592	0.589506	0.654586
GAGE12D	0.244682	0.414791	0.308981	0.0112958	0.659196	0.226537	0.126307	0.0187446
TAF7L	0.267797	0.606859	0.0541533	0.0122958	0.132045	0.801473	0.628643	0.633814
FTHL17	0.211707	0.474679	0.485496	0.0135956	0.64929	0.440803	0.690597	0.260099
LIPI	0.862063	0.233073	0.882218	0.0138182	0.720812	0.106228	0.0322538	0.90319
XAGE5	0.599941	1	0.784805	0.0167091	0.402102	0.776128	0.918661	0.64771
FMR1NB	0.503228	0.869174	0.618245	0.0174015	0.930989	0.612141	0.013588	0.0886547
DKKL1	0.104519	0.0786098	0.280819	0.0190793	0.470245	0.833401	0.920717	0.698642
ODF1	0.11062	0.471612	0.80965	0.0211405	0.590796	0.151491	0.164079	0.561952
CT47A1	1	0.849751	0.0508074	0.0250319	0.269524	7.14101e-05	0.939902	0.0601391
NXF2B	0.740738	0.881009	0.882632	0.0278411	0.981508	0.389329	0.547999	0.802292
LUZP4	0.246739	0.800413	0.0394444	0.0288182	0.536705	0.702141	0.693925	0.927422
MAGEB2	0.592962	0.759042	0.130241	0.0306971	0.22106	0.691743	0.331174	0.659349
ZNF645	0.3064	0.80052	0.294551	0.031222	0.339407	0.195307	0.900456	0.580128
SSX7	0.8769	0.205317	1	0.0358942	0.689692	0.817035	0.0187919	0.404792
CSAG1	0.0677545	0.475117	0.19617	0.0419615	0.182437	0.336751	0.0633165	0.996323
CPXCR1	0.559626	0.978372	0.106679	0.0430482	0.939455	0.877604	0.539894	0.344559
SLCO6A1	0.903151	0.306832	0.910904	0.0457998	0.80336	0.158011	0.194816	0.512533
SPANXN5	0.610925	0.462307	0.459175	0.0480263	0.986484	0.208528	0.773061	0.204941
GAGE12J	0.572984	0.478987	0.240709	0.0560493	0.64016	0.482039	0.288783	0.00197302
MAGEA4	0.32414	0.778614	0.0274616	0.0566218	0.333358	0.139116	0.342753	0.643144
CT62	0.168039	0.608227	0.02224	0.0587288	0.0565153	0.711645	0.879019	0.240637
ODF4	0.380716	0.849559	0.0878872	0.0594943	0.0894259	0.58527	0.565879	0.185498
ODF3	0.630424	0.203982	0.586869	0.0612602	0.6234	0.245628	0.892677	0.552935
MAGEA12	0.677903	0.484631	0.386173	0.0680186	0.420887	0.463814	0.685928	0.671233
MAGEB16	0.589188	0.519235	0.764533	0.0749484	0.793932	0.733502	0.141642	0.6242
THEG	0.265506	0.85475	0.289307	0.0909697	0.770606	0.947446	0.518823	0.141026
TSPY3	1	0.467932	0.928172	0.115331	0.637209	0.398937	1	0.478971
NXF2	0.598835	0.411959	0.445485	0.115861	0.956961	0.696746	0.422132	0.819589
POTED	0.590158	0.0478505	0.422285	0.128744	0.605951	0.230149	0.616782	0.385537
BAGE	0.258232	0.508312	0.792367	0.138126	0.996635	0.754388	0.532904	0.0936406
DDX53	0.893649	0.403803	0.787071	0.160658	0.608948	0.39134	0.698837	0.31046
RHOXF2B	0.369257	0.144885	0.654652	0.16336	0.378759	0.925144	0.927127	0.695819
MAGEA11	0.406873	0.485688	0.266635	0.175489	0.315099	0.654352	0.424288	0.194917
CT47A6	1	0.939321	0.652984	0.183427	0.304536	0.00530028	0.835685	0.108843
CT45A1	0.99854	0.227816	0.149587	0.188824	0.141213	0.419694	0.308272	0.134969
ADAM2	0.0434482	0.120648	0.111523	0.190387	0.342665	0.990214	0.475444	0.634641
SYCP1	0.560675	0.810803	0.4843	0.202625	0.4397	0.122364	0.117032	0.364095
TEX101	0.630324	0.133561	0.0308031	0.205649	0.699786	0.0473111	0.191537	0.0341162
MAGEA1	0.891886	0.732102	0.230949	0.209409	0.11672	0.0236584	0.877268	0.450337
MAGEA9B	0.639118	0.78821	0.676746	0.210032	0.0995262	0.632096	0.617139	0.76121
SPACA3	0.321086	0.581681	0.377074	0.227538	0.583538	0.209467	0.456059	0.126525
MAGEB18	0.153851	0.435034	0.0237554	0.236487	0.15013	0.966372	0.869684	0.0683959
BRDT	0.0135581	0.338676	0.531182	0.240889	0.438573	0.0602909	0.853324	0.292307
HORMAD1	0.302316	0.789548	0.00836759	0.269842	0.572568	0.860421	0.987765	0.817726
MAGEB3	0.356093	0.00205581	0.017415	0.272907	0.0663865	0.73476	0.0941593	0.376555
TSPY2	0.8769	0.486219	0.913896	0.311394	0.919635	0.193211	1	0.486194
ADAM29	0.949484	0.151581	0.440251	0.313175	0.266752	0.299004	0.685814	0.53623
SPANXN2	1	0.849559	0.802271	0.32197	0.933704	0.860266	0.853014	0.26705
TFDP3	0.890149	0.986337	0.448826	0.321999	0.244955	0.175496	0.867962	0.0120098
CAGE1	0.514446	0.804629	0.402152	0.342433	0.732077	0.688339	0.547563	0.285766
TEX15	0.334533	0.964403	0.116607	0.402465	0.00713753	0.413677	0.652146	0.0250399
SPATA19	0.424625	0.810886	0.826203	0.406927	0.913642	0.291695	0.646874	1
SAGE1	0.260722	0.247356	0.205335	0.426697	0.357682	0.35996	0.274523	0.893494
CCDC54	0.350389	0.768597	0.659369	0.43036	0.997428	0.291213	0.420334	0.0227471
MAEL	0.274097	0.824089	0.320977	0.43063	0.990902	0.985262	0.0722145	0.641464
SSX5	0.425575	0.980902	0.402321	0.435964	0.363785	0.870915	0.802548	0.804798
CXorf61	0.359083	0.151954	0.326275	0.44151	0.252878	0.612181	0.0955018	0.537841
TPTE	0.0265313	0.463102	0.483026	0.450142	0.717349	0.325968	0.869971	0.192647
MAGEA8	0.619342	0.584361	0.798762	0.455729	0.319075	0.721287	0.542947	0.533104
MAGEC1	0.552971	0.374807	0.167302	0.463178	0.962131	0.806735	0.924194	0.589432
CALR3	0.82452	0.994144	0.540799	0.513546	0.812512	0.0554337	0.305515	0.24772
CTAG1B	0.172748	0.563484	0.251091	0.575273	0.594128	0.680607	0.450315	0.656023
NLRP4	0.700705	0.50636	0.717466	0.598843	0.256434	0.907397	0.0797691	0.943681
LDHC	0.595596	0.979029	0.999113	0.636143	0.258295	0.199143	0.838474	0.186288
CTCFL	0.0382455	0.769634	0.209692	0.640043	0.0423731	0.57083	0.906388	0.367347
SPANXN4	1	1	1	0.641214	0.542145	0.561484	0.571896	0.670482
PRM2	0.765906	0.280564	0.482603	0.662807	0.819761	0.176057	0.0211975	0.259986
MORC1	0.742302	0.943881	0.944491	0.673546	0.0711197	0.956545	0.43109	0.509043
DPPA2	0.210329	0.292232	0.0777595	0.675274	0.572029	0.549358	0.533222	0.934009
SSX3	0.312743	0.167084	0.423875	0.703142	0.0442118	0.957978	0.124198	0.0621842
PAGE5	0.834137	0.608144	0.858663	0.727859	0.56319	0.972072	0.892927	0.400385
SPO11	0.0239534	0.572599	0.172958	0.789424	0.806686	0.612307	0.0701494	0.670482
PASD1	0.904627	0.895017	0.335866	0.805279	0.249352	0.181209	0.695442	0.18425
CT45A4	0.127742	0.104396	0.356406	0.80866	0.199469	0.0402986	0.18634	0.301412
POTEC	0.136112	0.251358	0.0803123	0.823169	0.102936	0.00685998	0.450879	0.0121655
TEX14	0.0294672	0.48069	0.0909326	0.840653	0.587685	0.649574	0.892961	0.944379
CT45A2	0.173768	0.143301	0.140494	0.860219	0.0567977	0.0461512	0.435005	0.491749
POTEB	0.0513756	0.800834	0.280389	0.883442	0.817012	0.412463	0.27255	0.125622
CT47B1	1.78914e-10	0.572625	0.80404	0.883784	0.870179	0.000205881	0.554506	0.699867
MAGEB4	0.21803	0.390767	0.32892	0.92146	0.0440388	0.764875	0.0342152	0.20576
PRSS54	0.785338	0.26219	0.102924	0.92365	0.366244	0.242119	0.687292	0.0455774
POTEH	0.0694238	0.929679	0.180224	0.946375	0.71703	0.569235	0.182821	0.918529
FAM46D	0.364509	0.786395	0.99925	0.954892	0.90409	0.387311	0.0276342	0.157324
RBM46	0.126503	0.705983	0.983058	0.962075	0.316803	0.152437	0.70161	0.904489
POTEA	1	0.849559	0.52937	0.979188	0.934347	0.438607	0.704405	0.358156
SEMG1	0.396646	0.340077	0.468726	0.984401	0.351512	0.484912	0.789043	0.731323
SSX6	0.599893	0.395638	0.152715	0.987666	0.487287	0.644529	0.940576	0.0263649
CT47A7	1	0.409921	1	1	1	1	0.675098	0.0470499
CT47A9	1	0.918088	1	1	0.705788	0.814936	0.911851	0.0586155
CT47A10	1	0.903127	1	1	0.819468	1	0.866725	0.058459
CT47A11	1	0.853118	1	1	0.662122	1	1	0.0544283
CT47A2	1	0.940807	0.2217	1	0.879505	0.000191488	0.182154	0.0585231
GAGE12F	1	0.532632	1	1	0.603804	0.0299753	0.101628	0.0593103
PRM1	1	0.464189	0.244108	1	0.48569	0.322282	0.453216	0.930104
